# Supplementary material for: Protocol for the Data-Linkage Alcohol Cohort Study (DACS): investigating mortality, morbidity and offending among people with an alcohol-related problem using linked administrative data
Source: PubMed Central journal article supplement — BMJ Open. 2019 Aug 5;9(8):e030605. doi: 10.1136/bmjopen-2019-030605 (PMC6687018; doi:10.1136/bmjopen-2019-030605), 2019-08-05
Supplement: bmjopen-2019-030605.draft_revisions.pdf [file bmjopen-2019-030605.draft_revisions.pdf]

# BMJ Open

BMJ Open is committed to open peer review. As part of this commitment we make the peer review history of every article we publish publicly available.

When an article is published we post the peer reviewers' comments and the authors' responses online. We also post the versions of the paper that were used during peer review. These are the versions that the peer review comments apply to.

The versions of the paper that follow are the versions that were submitted during the peer review process. They are not the versions of record or the final published versions. They should not be cited or distributed as the published version of this manuscript.

BMJ Open is an open access journal and the full, final, typeset and author-corrected version of record of the manuscript is available on our site with no access controls, subscription charges or pay-per-view fees (<http://bmjopen.bmj.com>).

If you have any questions on BMJ Open's open peer review process please email [info.bmjopen@bmj.com](mailto:info.bmjopen@bmj.com)

# BMJ Open

**The Data-linkage Alcohol Cohort Study (DACs):  
Investigating mortality, morbidity, offending and  
incarceration among people with an alcohol-related problem  
using linked administrative data**

|                               |                                                                                                                                                                                                                                                                                                                                                                                                                                                                                                                                                                                                           |
|-------------------------------|-----------------------------------------------------------------------------------------------------------------------------------------------------------------------------------------------------------------------------------------------------------------------------------------------------------------------------------------------------------------------------------------------------------------------------------------------------------------------------------------------------------------------------------------------------------------------------------------------------------|
| Journal:                      | <i>BMJ Open</i>                                                                                                                                                                                                                                                                                                                                                                                                                                                                                                                                                                                           |
| Manuscript ID                 | bmjopen-2019-030605                                                                                                                                                                                                                                                                                                                                                                                                                                                                                                                                                                                       |
| Article Type:                 | Protocol                                                                                                                                                                                                                                                                                                                                                                                                                                                                                                                                                                                                  |
| Date Submitted by the Author: | 22-Mar-2019                                                                                                                                                                                                                                                                                                                                                                                                                                                                                                                                                                                               |
| Complete List of Authors:     | Peacock, Amy; University of New South Wales, National Drug and Alcohol Research Centre;<br>Chiu, Vivian; University of Queensland, School of Psychology<br>Leung, Janni; University of Queensland, School of Medicine<br>Dobbins, Timothy<br>Larney, Sarah; University of NSW, National Drug and Alcohol Research Centre<br>Gisev, Natasa; University of New South Wales, National Drug and Alcohol Research Centre<br>Pearson, Sallie-Anne; University of New South Wales, Medicines Policy Research Unit<br>Degenhardt, Louisa; University of New SouthWales, National Drug and Alcohol Research Centre |
| Keywords:                     | alcohol, data linkage, mortality, morbidity, incarceration, offending                                                                                                                                                                                                                                                                                                                                                                                                                                                                                                                                     |
|                               |                                                                                                                                                                                                                                                                                                                                                                                                                                                                                                                                                                                                           |

SCHOLARONE™  
Manuscripts

1  
2  
3  
4  
5  
6 **The Data-linkage Alcohol Cohort Study (DACs): Investigating mortality, morbidity, offending and**  
7 **incarceration among people with an alcohol-related problem using linked administrative data**  
8  
9

10  
11 Amy Peacock<sup>1,2</sup>, Vivian Chiu<sup>1,3,4</sup>, Janni Leung<sup>1,3,4,5</sup>, Timothy Dobbins<sup>1</sup>, Sarah Larney<sup>1</sup>, Natasa Gisev<sup>1</sup>,  
12 Sallie-Anne Pearson<sup>6</sup>, & Louisa Degenhardt<sup>1</sup>  
13

14  
15 <sup>1</sup>National Drug and Alcohol Research Centre, University of New South Wales Sydney, Australia  
16

17 <sup>2</sup>School of Medicine (Psychology), University of Tasmania, Australia  
18

19 <sup>3</sup>School of Psychology, Brisbane, The University of Queensland, Australia  
20

21 <sup>4</sup>Centre for Youth Substance Abuse Research, Brisbane, The University of Queensland, Australia  
22

23 <sup>5</sup>Institute for Health Metrics and Evaluation, University of Washington, United States  
24

25 <sup>6</sup>Centre for Big Data Research in Health, University of New South Wales Sydney, Australia  
26  
27  
28  
29  
30  
31  
32  
33  
34  
35  
36  
37  
38  
39  
40  
41  
42  
43  
44  
45  
46  
47  
48

49 **Word Count:** 2146

50 **Corresponding author:** Amy Peacock, Research Fellow, National Drug and Alcohol Research Centre,  
51 University of New South Wales, e: [amy.peacock@unsw.edu.au](mailto:amy.peacock@unsw.edu.au), t: +61 2 9385 0333, f: +61 2 9385 0222.  
52  
53  
54  
55  
56  
57  
58  
59  
60

## Abstract

**Introduction:** Alcohol consumption is a leading cause of death and disability globally. The aim of this program of research is to use linked health and law enforcement data to establish and describe individuals presenting to emergency and inpatient health care services with an acute alcohol harm or problematic alcohol use; measure their health service utilisation and law enforcement engagement; and quantify morbidity, mortality, offending and incarceration among this cohort.

**Methods and analysis:** We will assemble a retrospective cohort of people presenting to emergency departments and hospitals between January 1<sup>st</sup>, 2005 and December 31<sup>st</sup>, 2014 in New South Wales, Australia with a diagnosis denoting an acute alcohol harm or problematic alcohol use. We will link their hospital data with records from other healthcare services (e.g., community-based mental health care provision, cancer registry), mortality, offending, and incarceration data sets. The four overarching areas for analysis comprise: i) describing at first point of contact the characteristics of those presenting to emergency and inpatient hospital services with a diagnosis indicating an acute alcohol harm and/or problematic alcohol use; ii) quantifying health service utilisation and law enforcement engagement; iii) quantifying rates of mortality, morbidity, offending and incarceration; and iii) assessing predictors (e.g., age, sex) of mortality, morbidity, offending, and incarceration amongst this cohort.

**Ethics and dissemination:** We will report our findings in accordance with the Reporting of studies Conducted using Observational Routinely-collected health Data statement (RECORD) and Guidelines for Accurate and Transparent Health Estimates Reporting (GATHER) where appropriate. We will publish data in tabular, aggregate forms only. We will not disclose individual results. We will disseminate project findings at scientific conferences and in peer-review journals. We will aim to present findings to relevant stakeholders (e.g., addiction medicine, emergency medicine, policy makers) to maximise translational impact of research findings.

**Keywords:** alcohol; data linkage; mortality; morbidity; incarceration; offending; harm

## STRENGTHS AND LIMITATIONS OF THIS STUDY

### Strengths:

- This study comprises a population-based cohort of people with a diagnosis indicating an acute alcohol problem and/or problematic alcohol use (as identified through emergency department attendances and hospital separations) over an extended period (2005-2014).
- There is a wealth of information on these participants through linkage to various routinely-collected administrative data sets (i.e., emergency department presentations, hospital separations, cancer notifications, mental health ambulatory care, mortality, offending, and incarceration).

### Limitations:

- Routinely-collected administrative data contain limited contextual information and represent an underestimate of total health and offending outcomes for these individuals (e.g., where not brought to the attention of, and recorded by, these services).
- Intervention and treatment for alcohol-related problems are not wholly captured across these data sources, and may impact experiences of morbidity, mortality, offending and incarceration.
- The study period represents a snapshot for each individual; some individuals may have an extensive history of engagement with healthcare and law enforcement prior to entry to the cohort but this cannot necessarily be identified with the data used here.

## Introduction

Reducing the health, social, and economic burden of alcohol use is a priority in Australia and globally<sup>1</sup>. Alcohol consumption is estimated to play a causal role in over 200 disease and injury conditions<sup>2</sup>. Approximately 3.9% of deaths and 1.8% of hospitalisations in Australia are alcohol-related<sup>3</sup>. Alcohol use negatively impacts on the community through reduced workplace productivity, traffic accidents, family problems, crime, and public disorder, with an estimated economic cost of \$14 billion annually<sup>4</sup>.

Recent evidence suggests increasing rates of alcohol-related problems in Australia over the past two decades despite evidence of declining population levels of consumption (particularly among young people)<sup>5-9</sup>. This increase in harms represents a significant burden on healthcare and law enforcement services. Indeed, recent estimates suggest that approximately one in ten emergency department presentations in Australia are alcohol-related<sup>10</sup>, with more than 144,000 alcohol-attributable hospitalisations in Australia in 2012/13<sup>11</sup>.

The aforementioned data are based on modeled estimates or on aggregated number of presentations to services. It is important to understand these events at the individual level: a significant proportion of people who experience alcohol-related problems will have recurrent problems, experience substantial morbidity and higher risk of mortality, and place significant burden on healthcare and law enforcement services. In Australia, there has been no attempt at the population level to longitudinally track people with alcohol-related problems to measure overall mortality, morbidity and other problems (e.g., offending and incarceration), despite such work for other substances (e.g., opioids<sup>12</sup>).

This project, named the Data linkage Alcohol Cohort Study (DACs), will use data linkage to identify individuals presenting to emergency department or inpatient hospital services with a diagnosis indicating an acute alcohol harm or problematic use. This cohort of people will be linked to additional health and law enforcement service data for robust measurement of alcohol-related harms and burden. The overarching objectives of this program of research are to:

1. Describe the cohort at their first point of contact with emergency department or inpatient hospital services within the study period for an acute alcohol harm and/or problematic alcohol use;
2. Quantify healthcare service utilisation and law enforcement engagement among the cohort (and associated economic costs) and assess individual and situational characteristics as predictors of frequency of engagement;
3. Quantify the rate of mortality, morbidity, offending and incarceration amongst the cohort, looking at overall rates and cause-specific outcomes where possible; and

4. Assess individual and situational characteristics as predictors of mortality, morbidity, offending and incarceration.

## Methods and Analysis

### Study Design

This study will link two routinely collected administrative datasets from New South Wales (NSW), Australia, to assemble a retrospective observational cohort of people presenting to emergency department and hospital inpatient services with an acute alcohol harm and/or problematic alcohol use. Once the cohort has been identified, their linked data from various other routinely-collected administrative data sets will be extracted, providing information on emergency department presentations, hospital separations, cancer notifications, mental health ambulatory care, mortality, offending, and incarceration. Data linkage will be undertaken by the Centre for Health Record Linkage (CheReL).

### Formation of Base Cohort

The base cohort will consist of individuals with a diagnosis indicating an acute alcohol harm or problematic alcohol use presenting to inpatient services (NSW Admitted Patient Data Collection; NSW APDC) and acute services (NSW Emergency Department Data Collection; NSW EDDC) in NSW between January 1<sup>st</sup>, 2005 and December 31<sup>st</sup>, 2014. Diagnostic classification systems used by NSW APDC and NSW EDDC in this period comprise the International Classification of Diseases and Health Related Problems 9<sup>th</sup> and 10<sup>th</sup> edition Australian Modification (ICD-9-CM or ICD-10-AM; APDC and EDDC) or the Systematized Nomenclature of Medicine--Clinical Terms Australian Modification (SNOMED-CT-AU; EDDC only). Diagnostic codes used for cohort inclusion were identified through a review of various sources on alcohol-related health burden and mortality (e.g., Chikritzhs, et al. <sup>13</sup>) and in consultation with specialists in the field (see **Table 1** for ICD-10 codes; see **Appendix 1** for all the diagnosis codes used for data extraction). A flowchart of how the base cohort will be formed and the administrative datasets to be linked (described in the next section) is presented in **Figure 1**. Inclusion in the cohort may be modified depending on the specific research question being addressed.

\*Table 1 approximately here\*

\*Figure 1 approximately here\*

### Datasets and Linkage

On identifying the base cohort, the CheReL will extract linked data for these individuals from a range of routinely-collected administrative data sets using probabilistic record linkage methods and

ChoiceMaker software<sup>14</sup>. Variables used for linkage will include full name, sex and date of birth. Descriptions of the data sets are presented in **Table 2**.

\*Table 2 approximately here\*

### **Patient and public involvement**

Patients were not involved in the design of the study. As described in our dissemination activities, we will aim to present findings to relevant stakeholders (e.g., addiction medicine, emergency medicine, policy makers) to maximise translational impact of research findings. We will prepare one-page summaries of key findings for distribution to drug treatment services and harm-reduction services.

### **Planned statistical analyses**

Below, we outline the core analyses to address the overarching research questions. In all analyses, multiple confounding variables will be controlled for as appropriate. We will also undertake the below analyses for the total cohort and focused specifically on those aged 15-24 years old. This younger age demographic has demonstrated significant recent shifts in alcohol consumption alongside increasing harms<sup>7,8</sup>, and also represents a portion of the sample likely to have no or limited engagement with healthcare and law enforcement services prior to the study period.

#### **Aim 1. Describe the cohort at their first point of contact with emergency department or inpatient hospital services within the study period for an acute alcohol harm and/or problematic alcohol use.**

We will describe the characteristics of the cohort at their index event (i.e., first emergency department presentation or hospital separation with an alcohol-related diagnosis, as listed in **Appendix 1**). Our description will include their individual characteristics (e.g., age, sex, socio-economic status) and situational characteristics of their presentation (e.g., hospital type (public/private), diagnosis). We will analyse the 12-month period prior to each person's index presentation to quantify existing health comorbidities (using an established comorbidity score, e.g., Charlson Comorbidity Index<sup>15</sup> or Elixhauser Comorbidity Index<sup>16</sup>), as well as offending and incarceration within that period. For these analyses, we will exclude individuals who had an index event within the first 12 months of the cohort commencement (i.e., between January 1<sup>st</sup> and December 31<sup>st</sup>, 2005) to ensure we have a complete 12-month period prior to index presentation.

#### **Aim 2. Quantify healthcare service utilisation and law enforcement engagement among the cohort (and associated economic costs) and assess individual and situational characteristics as predictors of frequency of engagement.**



1  
2  
3 We will calculate total number of emergency department presentations and hospital separations each  
4 year, and number of unique people each year with an emergency department presentation/hospital  
5 separation. We will estimate the number of hospital separations in two ways, as a count of: i) *episode-*  
6 *of-care*, defined as the period between a formal or statistical admission and a formal or statistical  
7 discharge, whereby the individual leaves hospital (discharge or death) or receives a different type of  
8 care, and ii) *a period-of-stay*, defined as the period between a formal admission and discharge/death,  
9 in which there might be multiple episodes of care (for example, transferring from acute care to  
10 rehabilitation)<sup>17</sup>. We will identify people who re-present to these services within 30 days of discharge  
11 (re-admission), as well as those individuals who attend at high-frequency ( $\geq 4$   
12 presentations/separations in a year) and high-intensity (average  $\geq 4$  presentations/separations in a  
13 year across period of follow-up or until death). We will use regression analyses to assess individual  
14 and situational characteristics of re-admission, high-frequency attendance, and high-intensity  
15 attendance. We will quantify engagement with law enforcement (offending and incarceration). We  
16 will also estimate costs associated with health service utilisation and law enforcement engagement  
17 using standard reference material for costs (e.g. Australian Refined Diagnosis Related Group (AR-DRG)  
18 codes for quantification of economic cost of hospital services<sup>18</sup>).

19  
20  
21  
22  
23  
24  
25  
26  
27  
28  
29  
30  
31  
32 **Aim 3. Quantify the rate of mortality, morbidity, offending and incarceration amongst the cohort,**  
33 **looking at overall rates and cause-specific outcomes where possible. Aim 4. Assess individual and**  
34 **situational characteristics as predictors of mortality, morbidity, offending and incarceration.**

35  
36  
37 **Mortality analyses.** We will calculate all-cause and cause-specific crude mortality rates as number of  
38 deaths in the cohort divided by person-years of observation. We will estimate all-cause and cause-  
39 specific standardised mortality ratios by comparing the observed number of deaths and expected  
40 number of deaths. We will stratify crude mortality rates and standardised mortality ratios by other  
41 demographic and situational characteristics where possible based on population data (e.g., age,  
42 geography, sex, comorbidity). We will conduct survival analyses to determine time from the index  
43 presentation to the outcome of interest (mortality or, if mortality does not occur, the censoring date)  
44 and use Cox proportional hazards regression to calculate hazard ratios for all-cause and cause-specific  
45 mortality based on time-independent (e.g., gender) and time-dependent variables (e.g., age, calendar  
46 year, geographic region, comorbidity score).

47  
48  
49  
50  
51  
52  
53  
54  
55 **Morbidity analyses.** The main outcome of interest will be time (measured by the number of days)  
56 between presentations. Individuals will be censored at the end of the study period or date of death,  
57 whichever occurred first. We will use survival analysis methods that incorporate multiple observations  
58 per person<sup>19</sup> to examine the relationship between the risk factors (individual and situational  
59  
60

1  
2  
3 characteristics at index) and the time interval distributions of recurrent presentations with multiple  
4 causes for each individual. We will examine any re-admission and alcohol-related re-admission as well  
5 as time to specific type of alcohol-related re-admission (as defined in Table 1). Risk factors will be  
6 identified for the entire cohort, adjusting for diagnostic groups. We will assess heterogeneity between  
7 diagnostic groups in the effect of risk factors descriptively. We will use the community-based mental  
8 health treatment data (MH-AMB) to undertake a sub-group analysis of people with comorbid mental  
9 health issues.

10  
11  
12  
13  
14  
15 **Offending and incarceration analyses.** To assess the frequencies of engagement with the criminal  
16 justice system among individuals with problematic use of alcohol, we will calculate rates of all offences  
17 and alcohol-related offences (as per BOCSAR classification in standard crime statistics reporting<sup>20</sup>) per  
18 1,000 person-years, as well as rates of incarceration episodes and time between offences (or death or  
19 end of follow-up, whichever comes first) distinguished by the characteristics of individuals (e.g.  
20 gender).

21  
22  
23  
24  
25  
26 We will use survival analysis methods to examine the relationship between engagement with health  
27 services (characterised by number of alcohol-related presentations) and time to a subsequent arrests  
28 (days to any offence/ days to alcohol-related offence). The hazard ratios for subsequent arrests will  
29 be adjusted for time-independent (e.g., gender, country of birth) and time-dependent variables (e.g.,  
30 age, comorbidity score, calendar year, length of hospital stay, geographic region, private/public  
31 hospital, types of procedures undergone, remoteness, socio-economic status).

### 32 33 34 35 36 37 **Methodological considerations**

38  
39  
40  
41  
42  
43  
44  
45  
46  
47  
48  
49  
50  
51  
52  
53  
54  
55  
56  
57  
58  
59  
60  
There are several key methodological considerations to be noted with the use of these data sets. The  
number of participating emergency departments has intermittently increased over time from around  
46 EDs in 1996 to around 90 in 2010<sup>21</sup>. There are around 150 EDs in NSW, and those servicing larger  
proportions of the NSW population are included, but possible under-ascertainment of total alcohol  
burden should be noted. Variation in computer programs and management practices at emergency  
departments and hospitals may lead to variation in diagnosis coding practices (i.e. ICD-9, ICD-10 and  
SNOMED codes entered by physicians) and in the screening and capture of alcohol involvement in  
healthcare presentations. Hence, the specificity of some disease categories may vary, and under-  
ascertainment of alcohol-related presentations is likely<sup>22</sup>. Finally, data on alcohol consumption, as well  
as intervention and treatment for problematic alcohol use, cannot be systematically ascertained from  
the included data sources.

### **Ethics and Dissemination**

### **Data storage, retention, and access**

To protect privacy and confidentiality, approval for the linkage of health data in NSW is provided under strict conditions for the storage, retention and use of the data. The current approval permits storage of the data at three sites, the University of New South Wales, University of Queensland, and University of Tasmania, for up to 5 years following the date of publication of results.

### **Dissemination**

Patients were not involved in the design of the study. We will report our findings in accordance with the Reporting of studies Conducted using Observational Routinely-collected health Data statement (RECORD)<sup>23</sup> and Guidelines for Accurate and Transparent Health Estimates Reporting (GATHER)<sup>24</sup> where appropriate. We will publish data in tabular, aggregate forms only and cells containing data from less than 10 participants will be suppressed. We will not disclose individual results.

We will disseminate project findings at scientific conferences and in peer-review journals. We will aim to present findings to relevant stakeholders (e.g., addiction medicine, emergency medicine, policy makers) to maximise translational impact of research findings.

### **Discussion**

This program of research will provide a comprehensive population-level understanding of the burden of problematic alcohol use on individuals and on healthcare and law enforcement services. It will extend knowledge of individual and situational factors that predict adverse alcohol-related outcomes, with the capacity to inform personalised intervention. The patterns of healthcare utilisation will also improve our knowledge of patient needs to enhance healthcare delivery for targeted populations. The multi-dimensional measurement of diverse events produced by this project can better reflect the scale and impact of alcohol-related problems which may be under-ascertained in the study of a single dataset.

1  
2  
3 **Authors' contributions:** AP and LD conceived the study idea. AP, LD, TD, NG, SL, SAP, and AD provided  
4 input to the study design and research questions. AP, TD, VC, and JL developed the statistical analysis  
5 plan. AP, VC, and JL completed the first draft of the manuscript. All authors reviewed the manuscript  
6 and provided input to the final draft.  
7  
8  
9

10  
11 **Funding statement:** This work was funded by research support funds awarded by UNSW Sydney to  
12 AP. AP, SL and LD are supported by NHMRC research fellowships (#1109366, #1140938 and  
13 #1041472/#1135991). SL and NG are supported by UNSW Scientia Fellowships. SL and LD are  
14 supported by NIH grant NIDA R01DA1104470. The National Drug and Alcohol Research Centre is  
15 supported by funding from the Australian Government Department of Health under the Drug and  
16 Alcohol Program.  
17  
18  
19  
20

21  
22 **Patient consent:** Not required.  
23  
24

25 **Competing interests:** None relevant to declare.  
26  
27

28 **Ethics approval:** New South Wales Population and Health Services Research Ethics Committee,  
29 approved in August 2016 (2016/08/650), valid for 5 years.  
30  
31

32 **Acknowledgements:** The authors wish to thank Professor Jürgen Rehm for his input on the diagnostic  
33 codes chosen. We wish to thank the Clinical Terminology Team at the National E-Health Transition  
34 Authority (now the Australian Digital Health Agency) for assisting with mapping ICD-10-AM codes to  
35 SCT-AU. We also wish to thank the NSW Ministry of Health, the Centre for Health Record Linkage  
36 (CHeReL), the Cancer Institute NSW and other data custodians for reviewing the project protocol,  
37 approving the project, and providing requested data. The Cause of Death Unit Record File (COD URF)  
38 is provided by the Australian Coordinating Registry for the COD URF on behalf of the NSW Registry of  
39 Births, Deaths and Marriages, NSW Coroner and the National Coronial Information System.  
40  
41  
42  
43  
44  
45  
46  
47  
48  
49  
50  
51  
52  
53  
54  
55  
56  
57  
58  
59  
60

## References

1. Australian Government Department of Health. National Drug Strategy 2017-2016. In: Health Do, ed. Canberra: Commonwealth of Australia 2017.
2. World Health Organization. Global status report on alcohol and health. Geneva: World Health Organization, 2018.
3. Gao C, Ogeil RP, Lloyd B. Alcohol's burden of disease in Australia. Canberra: Foundation for Alcohol Research and Education and VicHealth in collaboration with Turning Point, 2014.
4. Manning M, Smith C, Mazerolle P. The societal costs of alcohol misuse in Australia. Trends & issues in crime and criminal justice No. 454. Canberra: Australian Institute of Criminology, 2013.
5. Livingston M. Understanding recent trends in Australian alcohol consumption. Canberra: Foundation for Alcohol Research and Education, 2015.
6. Livingston M, Matthews S, Barratt MJ, et al. Diverging trends in alcohol consumption and alcohol-related harm in Victoria. *Australian and New Zealand Journal of Public Health* 2010;34(4):368-73.
7. Livingston M. Recent trends in risky alcohol consumption and related harm among young people in Victoria, Australia. *Australian and New Zealand Journal of Public Health* 2008;32(3):266-71.
8. Callinan S, Pennay A, Livingston M, et al. Patterns in Reduction or Cessation of Drinking in Australia (2001–2013) and Motivation for Change. *Alcohol and Alcoholism* 2018;54(1):79-86. doi: 10.1093/alcalc/agy072
9. Livingston M, Callinan S, Raninen J, et al. Alcohol consumption trends in Australia: Comparing surveys and sales-based measures. *Drug and Alcohol Review* 2018;37:S9-S14.
10. Egerton-Warburton D, Gosbell A, Moore K, et al. Alcohol-related harm in emergency departments: a prospective, multi-centre study. *Addiction* 2018;113(4):623-32. doi: 10.1111/add.14109
11. Lensvelt E, Gilmore W, Liang W, et al. Estimated alcohol-attributable deaths and hospitalisations in Australia 2004 to 2015. National Alcohol Indicators, Bulletin 16. Perth: National Drug Research Institute, Curtin University. , 2018.
12. Degenhardt L, Larney S, Kimber J, et al. The impact of opioid substitution therapy on mortality post-release from prison: retrospective data linkage study. *Addiction* 2014;109(8):1306-17. doi: 10.1111/add.12536
13. Chikritzhs T, Catalano P, Stockwell T, et al. Australian alcohol indicators, 1990-2001: Patterns of alcohol use and related harms for Australian states and territories. Perth: National Drug Research Institute, Curtin University, 2003.
14. Key Concepts of the ChoiceMaker 2 Record Matching System [program]. Washington, DC, 2003.
15. Charlson M, Szatrowski TP, Peterson J, et al. Validation of a combined comorbidity index. *J Clin Epidemiol* 1994;47(11):1245-51. [published Online First: 1994/11/01]
16. Elixhauser A, Steiner C, Harris DR, et al. Comorbidity measures for use with administrative data. *Medical Care* 1998;8-27.
17. AIHW. Australian Institute of Health and Welfare - Hospitals Glossary 2018 [Available from: <https://www.aihw.gov.au/reports-data/health-welfare-services/hospitals/glossary>].
18. Australian Refined Diagnosis Related Groups (AR-DRG) Classification Version 8.0 Australian Consortium for Classification Development.
19. Amorim LD, Cai J. Modelling recurrent events: a tutorial for analysis in epidemiology. *Int J Epidemiol* 2015;44(1):324-33. doi: 10.1093/ije/dyu222 [published Online First: 2014/12/17]
20. AIHW. Australian and New Zealand Standard Offence Classification (ANZSOC). Cat. no. 1234.0., 2011.
21. NSW Ministry of Health. NSW Emergency Department Data Collection: Data Dictionary. Sydney: NSW Ministry of Health, 2017.
22. McKenzie K, Harrison JE, McClure RJ. Identification of alcohol involvement in injury - related hospitalisations using routine data compared to medical record review. *Australian and New Zealand Journal of Public Health* 2010;34(2):146-52.

- 1  
2  
3 23. Benchimol EI, Smeeth L, Guttman A, et al. The REporting of studies Conducted using  
4 Observational Routinely-collected health Data (RECORD) statement. *PLoS Medicine*  
5 2015;12(10):e1001885. doi: 10.1371/journal.pmed.1001885  
6  
7 24. Stevens GA, Alkema L, Black RE, et al. Guidelines for Accurate and Transparent Health Estimates  
8 Reporting: the GATHER statement. *Lancet* 2016;388(10062):e19-e23. doi: 10.1016/S0140-  
9 6736(16)30388-9  
10  
11  
12  
13  
14  
15  
16  
17  
18  
19  
20  
21  
22  
23  
24  
25  
26  
27  
28  
29  
30  
31  
32  
33  
34  
35  
36  
37  
38  
39  
40  
41  
42  
43  
44  
45  
46  
47  
48  
49  
50  
51  
52  
53  
54  
55  
56  
57  
58  
59  
60

For peer review only

Table 1. Alcohol-related diagnosis codes used from the International Classification of Diseases and Health Related Problems, 10th edition Australian Modification (ICD-10-AM)

| Alcohol-related diagnosis                                   | ICD-10-AM codes                          |
|-------------------------------------------------------------|------------------------------------------|
| Alcohol-induced pseudo-Cushing's syndrome                   | E24.4                                    |
| Wernicke encephalopathy                                     | E51.2                                    |
| Mental and behavioural disorders due to use of alcohol      | F10                                      |
| Degeneration of nervous system due to alcohol               | G31.2                                    |
| Alcoholic polyneuropathy                                    | G62.1                                    |
| Alcoholic myopathy                                          | G72.1                                    |
| Alcoholic cardiomyopathy                                    | I42.6                                    |
| Alcoholic gastritis                                         | K29.2                                    |
| Alcohol-induced liver diseases                              | K70.0, K70.1, K70.2, K70.3, K70.4, K70.9 |
| Alcohol-induced pancreatitis                                | K85.2, K86.0                             |
| Maternal care for (suspected) damage to foetus from alcohol | O35.4                                    |
| Foetal alcohol syndrome (dysmorphic)                        | Q86.0                                    |
| Detection of alcohol in blood                               | R78.0, T51, X45, X65, Y15, Y90, Y91      |

Note. Diagnostic classification systems used by NSW APDC and NSW EDDC in this period comprise the International Classification of Diseases and Health Related Problems 9<sup>th</sup> and 10<sup>th</sup> edition Australian Modification (ICD-9-CM or ICD-10-AM; APDC and EDDC) or the Systematized Nomenclature of Medicine--Clinical Terms Australian Modification (SNOMED-CT-AU; EDDC only). Diagnostic codes used for cohort inclusion were identified through a review of various sources on alcohol-related health burden and mortality and in consultation with specialists in the field (see **Appendix 1** for all the diagnosis codes used for data extraction).



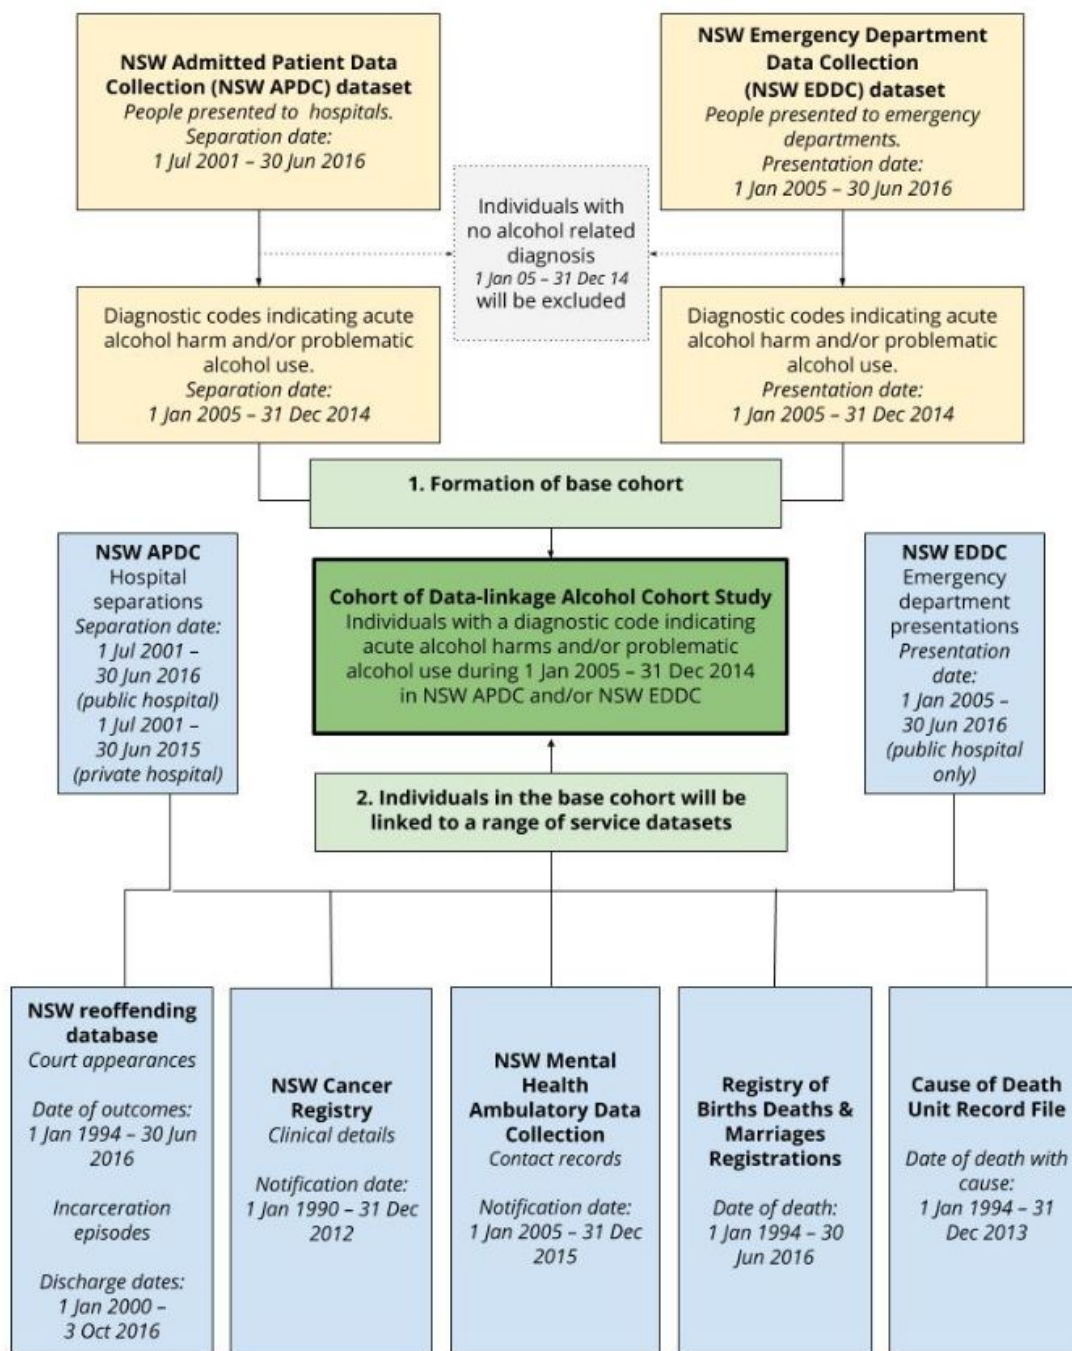

Figure 1. Formation of the Data-linkage Cohort Study (DACCS)



Table 2. Datasets for Linkage

| Database                                              | Description                                                                                                                                                                                                            | Key variables                                                                                                                                                                                                  |
|-------------------------------------------------------|------------------------------------------------------------------------------------------------------------------------------------------------------------------------------------------------------------------------|----------------------------------------------------------------------------------------------------------------------------------------------------------------------------------------------------------------|
| NSW Admitted Patients Data Collection (NSW APDC)      | Records of all hospital separations (including discharges, transfers and deaths) from all public and private hospitals, public multi-purpose services, and day procedure centres in NSW.                               | Records for each episode of care include date of admission and separation, emergency status, principal and additional diagnoses, treatment procedures, mode of separation and facility identifier.             |
| NSW Emergency Department Data Collection (NSW EDDC)   | Records of all presentations to Emergency Departments in major metropolitan and major non-metropolitan public hospitals in NSW.                                                                                        | Records for each episode of care include date of admission and separation, emergency status, diagnosis, mode of arrival and separation and facility identifier.                                                |
| NSW Mental Health Ambulatory Data Collection (MH-AMB) | Records of episodes of care delivered by NSW ambulatory mental health service units to non-admitted individuals, including day programmes, psychiatric outpatients and outreach services.                              | Records for each contact include date of contact, diagnosis and services delivered. Facility information includes provider group, provider role and service category and facility location.                    |
| NSW Central Cancer Registry                           | Records of all new cases of cancer (defined as an occurrence of a primary malignant neoplasm in an organ of a particular person; excluding occurrence of skin cancers other than melanoma) diagnosed in NSW residents. | Data includes clinical details of individuals e.g. cancer group, degree of spread, date and age of diagnosis. If applicable, information regarding date and age of death, and cause of death is also included. |

|                                                                                                                                                     |                                                                                                                                                                                                                                                                                                                  |                                                                                                                                                                                                                   |
|-----------------------------------------------------------------------------------------------------------------------------------------------------|------------------------------------------------------------------------------------------------------------------------------------------------------------------------------------------------------------------------------------------------------------------------------------------------------------------|-------------------------------------------------------------------------------------------------------------------------------------------------------------------------------------------------------------------|
| <p>NSW Re-offending Database (ROD)</p>                                                                                                              | <p>Court records, with all finalised court appearances in NSW Children’s, Local, District and Supreme Courts, and juvenile detention and adult incarceration in NSW.</p>                                                                                                                                         | <p>Records include date and type of offence, outcome of court appearance, conviction date and penalty. Incarceration information includes commencement and conclusion date of incarceration, conviction date.</p> |
| <p>NSW Registry of Births, Deaths and Marriages (RBDM) and the Australian Coordinating Registry (ACR) Cause of Death Unit Record File (COD URF)</p> | <p>The two datasets contain mortality information for deaths occurring in NSW, which also includes Australian Bureau of Statistics (ABS) death registration data. The Cause of Death Unit Record File is held by the NSW Ministry of Health Secure Analytics for Population Health Research and Intelligence</p> | <p>Data includes date of death and contributing or multiple cause of death codes (where relevant).</p>                                                                                                            |

## Appendix 1: Diagnostic codes used for data extraction

### A) ICD codes

The codes on the following sheet will be used to identify people in the Admitted Patients Data Collection and Emergency Department Data Collection (cases). Codes were selected based on identification by NSW Health as reflective of an acute alcohol problem<sup>1</sup> or, where indicated (\*) from Turning Point Alcohol and Drug Centre guidance for calculating alcohol and other drug statistics<sup>2</sup>. Where indicated (~), additional codes are included on the basis of discussion between investigators and specialists in the field. ICD-9-CM and ICD-10-AM codes were mapped using the Australian Consortium for Classification Development mapping tables, with backwards mapping from ICD-10-AM to ICD-9-CM<sup>3</sup>, and alcohol-specific code mapping developed by Chikritzhs et al.<sup>4</sup>.

| ICD-10-AM | Conditions                                                 | ICD-9-CM                                  | Conditions                                                     |
|-----------|------------------------------------------------------------|-------------------------------------------|----------------------------------------------------------------|
| E24.4     | *Alcohol-induced pseudo-Cushing's syndrome                 | <i>No alcohol-specific code available</i> |                                                                |
| E51.2     | ~Wernicke encephalopathy                                   | 291.1                                     | Alcohol-induced persisting amnesic disorder                    |
| F10       | Mental and behavioural disorders due to use of alcohol     | 291                                       | Alcohol-induced mental disorders                               |
|           |                                                            | 303                                       | Alcohol dependence syndrome                                    |
|           |                                                            | 305.0                                     | Nondependent alcohol abuse                                     |
| G31.2     | *Degeneration of nervous system due to alcohol             | 303                                       | Alcohol dependence syndrome                                    |
| G62.1     | *Alcoholic polyneuropathy                                  | 357.5                                     | *Alcoholic polyneuropathy                                      |
| G72.1     | *Alcoholic myopathy                                        | <i>No alcohol-specific code available</i> |                                                                |
| I42.6     | *Alcoholic cardiomyopathy                                  | 425.5                                     | *Alcoholic cardiomyopathy                                      |
| K29.2     | *Alcoholic gastritis                                       | 535.3                                     | *Alcoholic gastritis                                           |
| K70.0     | Alcoholic fatty liver                                      | 571.0                                     | *Alcoholic fatty liver                                         |
| K70.1     | Alcoholic hepatitis                                        | 571.1                                     | Acute alcoholic hepatitis                                      |
| K70.2     | Alcoholic fibrosis and sclerosis of liver                  |                                           |                                                                |
| K70.3     | Alcoholic cirrhosis of liver                               | 571.2                                     | Alcoholic cirrhosis of liver                                   |
| K70.4     | Alcoholic hepatic failure                                  |                                           |                                                                |
| K70.9     | Alcoholic liver disease, unspecified                       | 571.3                                     | Alcoholic liver damage, unspecified                            |
| K85.2     | *Alcohol-induced acute pancreatitis                        | <i>No alcohol-specific code available</i> |                                                                |
| K86.0     | *Alcohol-induced chronic pancreatitis                      | <i>No alcohol-specific code available</i> |                                                                |
| O35.4     | *Maternal care for suspected damage to foetus from alcohol | <i>No alcohol-specific code available</i> |                                                                |
| P04.3     | *Foetus and newborn affected by maternal use of alcohol    | 760.71                                    | Alcohol affecting fetus or newborn via placenta or breast milk |

|                    |                                                                     |                                           |                                                          |
|--------------------|---------------------------------------------------------------------|-------------------------------------------|----------------------------------------------------------|
| Q86.0              | *Foetal alcohol syndrome (dysmorphic)                               |                                           |                                                          |
| R78.0              | Finding of alcohol in blood                                         | 790.3                                     | Excessive blood level of alcohol                         |
| T51                | Toxic effect of alcohol                                             | 980                                       | Toxic effect of alcohol                                  |
| X45                | Accidental poisoning by and exposure to alcohol                     | E860                                      | Accidental poisoning by alcohol not elsewhere classified |
| X65 <sup>^</sup>   | Intentional self-poisoning by and exposure to alcohol               | <i>No alcohol-specific code available</i> |                                                          |
| Y15                | Poisoning by and exposure to alcohol, undetermined intent           | E860                                      | Accidental poisoning by alcohol not elsewhere classified |
|                    |                                                                     | 980                                       | Toxic effect of alcohol                                  |
| Y90 <sup>^^</sup>  | Evidence of alcohol involvement determined by blood alcohol level   | <i>No alcohol-specific code available</i> |                                                          |
| Y91 <sup>^^^</sup> | Evidence of alcohol involvement determined by level of intoxication | <i>No alcohol-specific code available</i> |                                                          |

<sup>^</sup>note that no generalised mapping matches were available with SNO-MED although lexical matching suggest use of the above codes

<sup>^^</sup>note that no generalised mapping matches were available with SNO-MED although lexical matching suggest use of the 'Finding of alcohol in blood' code

<sup>^^^</sup>note that generalised mapping matches were only available for Y91.1 and Y91.9 with SNO-MED although lexical matching suggest use of 'Alcohol intoxication' code<sup>∞</sup>

## B) SNOMED codes

The following codes will be used to identify people in the Emergency Department Data Collection (cases). Emergency departments may use either or a combination of ICD-9, ICD-10 (see above) or SNOMED. Codes were mapped in consultation with the Clinical Terminology Team at the National E-Health Transition Authority (now Australian Digital Health Agency) to approximate ICD-10-AM codes using lexical and generalised mapping (the latter comprising the International SCT-ICD map) for SCT-AU (v20160430 April 2016). A number of codes were only found in ICD-10 and not ICD-10-CM (F10 K29.20 K29.21 T51 X45 X65 Y90 Y91), and thus these codes were searched with a wildcard for the last character, yielding hits for the following codes (F10.0 F10.1 F10.2 F10.3 F10.4 F10.5 F10.6 F10.7 F10.8 F10.9 K29.2 T51.0 T51.1 T51.2 T51.3 T51.9 X45 X45.99 Y91.1 Y91.9). Lexical mapping (i.e., synonym with a lexical match) was used for those codes where a hit was not identified with the International SCT-ICD map. Note that those variables flagged with a # were added following review of NSW Health codes for acute emergency department presentation data; the same applies where flagged with a ^, with the exception that these terms are now deprecated.

| ICD-10-AM | ICD-9-CM                                  | SNOMED-CT-AU    | CONDITIONS                                  |
|-----------|-------------------------------------------|-----------------|---------------------------------------------|
| E24.4     | <i>No alcohol-specific code available</i> | 237738005       | Pseudo-Cushing's syndrome due to alcohol    |
| E51.2     | 291.1                                     | 21007002        | Wernicke's disease                          |
| F10       | 291                                       | 191477001       | Pathological alcohol intoxication           |
|           | 303                                       | 42344001        | Alcohol-induced psychosis                   |
|           | 305.0                                     | 25702006        | Alcohol intoxication                        |
|           |                                           | 228315001       | Binge drinker                               |
|           |                                           | 18653004        | Alcohol intoxication delirium               |
|           |                                           | 21000000        | Idiosyncratic intoxication                  |
|           |                                           | 228341007       | Unable to abstain from drinking             |
|           |                                           | 32553006        | Hangover                                    |
|           |                                           | 228357007       | Persistent effect of alcohol                |
|           |                                           | 228316000       | Alcoholic binges exceeding sensible amounts |
|           |                                           | 268645007       | Nondependent alcohol abuse                  |
|           |                                           | 228354000       | Drink driving                               |
|           |                                           | 228317009       | Alcoholic binges exceeding safe amounts     |
|           |                                           | 191883007       | Nondependent alcohol abuse, episodic        |
|           |                                           | 169942003       | Maternal alcohol abuse                      |
|           |                                           | 304605000       | Methanol abuse                              |
|           |                                           | 288021000119107 | Disorder due to alcohol abuse               |
|           |                                           | 191882002       | Nondependent alcohol abuse, continuous      |
|           |                                           | 15167005        | Alcohol abuse                               |
|           |                                           | 284591009       | Persistent alcohol abuse                    |

|    |  |                   |                                                        |
|----|--|-------------------|--------------------------------------------------------|
| 1  |  |                   |                                                        |
| 2  |  |                   |                                                        |
| 3  |  | 228310006         | Drinks in morning to get rid of hangover               |
| 4  |  |                   |                                                        |
| 5  |  | 41083005          | Alcohol-induced sleep disorder                         |
| 6  |  |                   |                                                        |
| 7  |  | 191884001         | Nondependent alcohol abuse in remission                |
| 8  |  |                   |                                                        |
| 9  |  | 86325007          | Non megaloblastic anaemia due to alcoholism            |
| 10 |  |                   |                                                        |
| 11 |  | 191805002         | Episodic acute alcoholic intoxication in alcoholism    |
| 12 |  |                   |                                                        |
| 13 |  | 191802004         | Acute alcoholic intoxication in alcoholism             |
| 14 |  |                   |                                                        |
| 15 |  | 7200002           | Alcoholism                                             |
| 16 |  |                   |                                                        |
| 17 |  | 235955000         | Drug-induced chronic pancreatitis                      |
| 18 |  |                   |                                                        |
| 19 |  | 66590003          | Alcohol dependence                                     |
| 20 |  |                   |                                                        |
| 21 |  | 713583005         | Mild alcohol dependence                                |
| 22 |  |                   |                                                        |
| 23 |  | 2403008           | Psychoactive substance dependence                      |
| 24 |  |                   |                                                        |
| 25 |  | 25702006          | Alcohol intoxication                                   |
| 26 |  |                   |                                                        |
| 27 |  | 7200002           | Alcoholism                                             |
| 28 |  |                   |                                                        |
| 29 |  | 308742005         | Alcohol withdrawal-induced convulsion                  |
| 30 |  |                   |                                                        |
| 31 |  | 713862009         | Severe alcohol dependence                              |
| 32 |  |                   |                                                        |
| 33 |  | 10755041000119100 | Alcohol dependence in childbirth                       |
| 34 |  |                   |                                                        |
| 35 |  | 191812006         | Episodic chronic alcoholism                            |
| 36 |  |                   |                                                        |
| 37 |  | 2403008           | Psychoactive substance dependence                      |
| 38 |  |                   |                                                        |
| 39 |  | 154211000119108   | Chronic pancreatitis due to chronic alcoholism         |
| 40 |  |                   |                                                        |
| 41 |  | 191804003         | Continuous acute alcoholic intoxication in alcoholism  |
| 42 |  |                   |                                                        |
| 43 |  | 191813001         | Chronic alcoholism in remission                        |
| 44 |  |                   |                                                        |
| 45 |  | 7200002           | Alcoholism                                             |
| 46 |  |                   |                                                        |
| 47 |  | 87810006          | Megaloblastic anaemia due to alcoholism                |
| 48 |  |                   |                                                        |
| 49 |  | 66590003          | Alcohol dependence                                     |
| 50 |  |                   |                                                        |
| 51 |  | 231467000         | Absinthe addiction                                     |
| 52 |  |                   |                                                        |
| 53 |  | 300939009         | Abstinent alcoholic                                    |
| 54 |  |                   |                                                        |
| 55 |  | 191811004         | Continuous chronic alcoholism                          |
| 56 |  |                   |                                                        |
| 57 |  | 714829008         | Moderate alcohol dependence                            |
| 58 |  |                   |                                                        |
| 59 |  | 235952002         | Chronic pancreatitis due to acute alcohol intoxication |
| 60 |  |                   |                                                        |
|    |  | 97571000119109    | Thrombocytopenia co-occurrent and due to alcoholism    |
|    |  |                   |                                                        |
|    |  | 66590003          | Alcohol dependence                                     |
|    |  |                   |                                                        |
|    |  | 10741871000119101 | Alcohol dependence in pregnancy                        |
|    |  |                   |                                                        |
|    |  | 288041000119101   | Perceptual disturbance due to alcohol withdrawal       |

|    |  |           |                                                                                                                                                  |
|----|--|-----------|--------------------------------------------------------------------------------------------------------------------------------------------------|
| 1  |  |           |                                                                                                                                                  |
| 2  |  |           |                                                                                                                                                  |
| 3  |  | 191480000 | Alcohol withdrawal syndrome                                                                                                                      |
| 4  |  | 85561006  | Uncomplicated alcohol withdrawal                                                                                                                 |
| 5  |  | 191480000 | Alcohol withdrawal syndrome                                                                                                                      |
| 6  |  | 8635005   | Alcohol withdrawal delirium                                                                                                                      |
| 7  |  | 79578000  | Alcohol paranoia                                                                                                                                 |
| 8  |  | 61144001  | Alcohol-induced psychotic disorder with delusions                                                                                                |
| 9  |  | 191476005 | Alcohol withdrawal hallucinosis                                                                                                                  |
| 10 |  | 7052005   | Alcohol hallucinosis                                                                                                                             |
| 11 |  | 42344001  | Alcohol-induced psychosis                                                                                                                        |
| 12 |  | 191480000 | Alcohol withdrawal syndrome                                                                                                                      |
| 13 |  | 191478006 | Alcoholic paranoia                                                                                                                               |
| 14 |  | 191471000 | Korsakov's alcoholic psychosis with peripheral neuritis                                                                                          |
| 15 |  | 73097000  | Alcohol amnestic disorder                                                                                                                        |
| 16 |  | 192811002 | Alcoholic encephalopathy                                                                                                                         |
| 17 |  | 69482004  | Korsakoff's psychosis                                                                                                                            |
| 18 |  | 42344001  | Alcohol-induced psychosis                                                                                                                        |
| 19 |  | 281004    | Dementia associated with alcoholism                                                                                                              |
| 20 |  | 231463001 | ^Alcoholic dementia NOS (disorder)                                                                                                               |
| 21 |  | 191475009 | Chronic alcoholic brain syndrome                                                                                                                 |
| 22 |  | 78524005  | Alcohol-induced sexual dysfunction                                                                                                               |
| 23 |  | 34938008  | Alcohol-induced anxiety disorder                                                                                                                 |
| 24 |  | 228353006 | Reverse tolerance to alcohol                                                                                                                     |
| 25 |  | 228351008 | Physical tolerance to alcohol                                                                                                                    |
| 26 |  | 228350009 | Behavioural tolerance to alcohol                                                                                                                 |
| 27 |  | 53936005  | Alcohol-induced mood disorder                                                                                                                    |
| 28 |  | 228323004 | Drinking bout                                                                                                                                    |
| 29 |  | 29212009  | Alcohol-induced organic mental disorder                                                                                                          |
| 30 |  | 228322009 | Drinking episode                                                                                                                                 |
| 31 |  | 192206005 | ^Mental and behavioral disorders due to use of alcohol (disorder)                                                                                |
| 32 |  | 192207001 | ^Mental and behavioral disorders due to use of alcohol: acute intoxication (disorder)                                                            |
| 33 |  | 192208006 | ^Mental and behavioral disorders due to use of alcohol: harmful use (disorder)                                                                   |
| 34 |  | 192209003 | ^Mental and behavioural disorders due to use of alcohol: dependence syndrome) or (chronic alcoholism [& (addiction) or (dipsomania)]) (disorder) |
| 35 |  |           |                                                                                                                                                  |
| 36 |  |           |                                                                                                                                                  |
| 37 |  |           |                                                                                                                                                  |
| 38 |  |           |                                                                                                                                                  |
| 39 |  |           |                                                                                                                                                  |
| 40 |  |           |                                                                                                                                                  |
| 41 |  |           |                                                                                                                                                  |
| 42 |  |           |                                                                                                                                                  |
| 43 |  |           |                                                                                                                                                  |
| 44 |  |           |                                                                                                                                                  |
| 45 |  |           |                                                                                                                                                  |
| 46 |  |           |                                                                                                                                                  |
| 47 |  |           |                                                                                                                                                  |
| 48 |  |           |                                                                                                                                                  |
| 49 |  |           |                                                                                                                                                  |
| 50 |  |           |                                                                                                                                                  |
| 51 |  |           |                                                                                                                                                  |
| 52 |  |           |                                                                                                                                                  |
| 53 |  |           |                                                                                                                                                  |
| 54 |  |           |                                                                                                                                                  |
| 55 |  |           |                                                                                                                                                  |
| 56 |  |           |                                                                                                                                                  |
| 57 |  |           |                                                                                                                                                  |
| 58 |  |           |                                                                                                                                                  |
| 59 |  |           |                                                                                                                                                  |
| 60 |  |           |                                                                                                                                                  |

|       |       |                 |                                                                                                                                                             |
|-------|-------|-----------------|-------------------------------------------------------------------------------------------------------------------------------------------------------------|
|       |       | 192210008       | ^Mental and behavioral disorders due to use of alcohol: withdrawal state (disorder)                                                                         |
|       |       | 192211007       | ^Mental and behavioral disorders due to use of alcohol: withdrawal state with delirium (disorder)                                                           |
|       |       | 192212000       | ^Mental and behavioural disorders due to use of alcohol: psychotic disorder (& [hallucinosi] or [jealousy] or [paranoia] or [psychosis NOS])                |
|       |       | 192213005       | ^Mental and behavioral disorders due to use of alcohol: amnesic syndrome (disorder)                                                                         |
|       |       | 192214004       | ^Mental and behavioural disorders due to use of alcohol: residual and late-onset psychotic disorder) or (chronic alcoholic brain syndrome [& dementia NOS]) |
|       |       | 192215003       | ^Mental and behavioral disorders due to use of alcohol: other mental and behavioral disorders (disorder)                                                    |
|       |       | 268639004       | ^Chronic alcoholism (disorder)                                                                                                                              |
|       |       | 268683008       | ^Mental and behavioral disorders due to use of alcohol: dependence syndrome (disorder)                                                                      |
|       |       | 268684002       | ^Mental and behavioral disorders due to use of alcohol: psychotic disorder (disorder)                                                                       |
|       |       | 304606004       | ^Ethanol abuse (finding)                                                                                                                                    |
|       |       | 268685001       | ^Mental and behavioral disorders due to use of alcohol: residual and late-onset psychotic disorder (disorder)                                               |
|       |       | 192216002       | ^Mental and behavioral disorders due to use of alcohol: unspecified mental and behavioral disorder (disorder)                                               |
| G31.2 | 303   | 192811002       | Alcoholic encephalopathy                                                                                                                                    |
|       |       | 133301000119102 | Degenerative brain disorder due to alcohol                                                                                                                  |
|       |       | 300992002       | Alcohol-induced cerebellar ataxia                                                                                                                           |
|       |       | 361272001       | Cerebellar ataxia due to alcoholism                                                                                                                         |
|       |       | 135761000119101 | Cerebral degeneration due to alcoholism                                                                                                                     |
|       |       | 230353003       | Morel laminar sclerosis                                                                                                                                     |
|       |       | 361273006       | Alcoholic cerebellar degeneration                                                                                                                           |
| G62.1 | 357.5 | 192811002       | Alcoholic encephalopathy                                                                                                                                    |



|       |                                           |                  |                                                            |
|-------|-------------------------------------------|------------------|------------------------------------------------------------|
|       |                                           | 69482004         | Korsakoff's psychosis                                      |
|       |                                           | 191471000        | Korsakov's alcoholic psychosis with peripheral neuritis    |
|       |                                           | 7916009          | Alcoholic polyneuropathy                                   |
|       |                                           | 191472007        | #Wernicke-Korsakov syndrome (disorder)                     |
| G72.1 | <i>No alcohol-specific code available</i> | 19303008         | Alcohol myopathy                                           |
| I42.6 | 425.5                                     | 83521008         | Dilated cardiomyopathy caused by alcohol                   |
| K29.2 | 535.3                                     | 2043009          | Alcoholic gastritis                                        |
|       |                                           | 40241000119109   | Gastric haemorrhage due to alcoholic gastritis             |
| K70.0 | 571.0                                     | 41309000         | Alcoholic liver damage                                     |
| K70.1 | 571.1                                     | 50325005         | Alcoholic fatty liver                                      |
| K70.2 | 571.2                                     | 235875008        | Alcoholic hepatitis                                        |
| K70.3 | 571.3                                     | 9953008          | Acute alcoholic liver disease                              |
| K70.4 |                                           | 1085021000119106 | Hepatic ascites due to chronic alcoholic hepatitis         |
| K70.9 |                                           | 1082611000119101 | Ascites due to alcoholic hepatitis                         |
|       |                                           | 41309000         | Alcoholic liver damage                                     |
|       |                                           | 307757001        | Chronic alcoholic hepatitis                                |
|       |                                           | 235880004        | Alcoholic fibrosis and sclerosis of liver                  |
|       |                                           | 420054005        | Alcoholic cirrhosis                                        |
|       |                                           | 309783001        | Oesophageal varices in alcoholic cirrhosis of the liver    |
|       |                                           | 1082601000119104 | Ascites due to alcoholic cirrhosis                         |
|       |                                           | 235881000        | Alcoholic hepatic failure                                  |
|       |                                           | 1082621000119108 | Hepatic coma due to alcoholic liver failure                |
|       |                                           | 713370005        | Acute on chronic alcoholic liver disease                   |
|       |                                           | 713181003        | Chronic alcoholic liver disease                            |
| K85.2 | <i>No alcohol-specific code available</i> | 235942001        | Alcohol-induced acute pancreatitis                         |
|       |                                           | 445507008        | Alcohol-induced pancreatitis                               |
| K86.0 | <i>No alcohol-specific code available</i> | 235952002        | Chronic pancreatitis due to acute alcohol intoxication     |
|       |                                           | 154211000119108  | Chronic pancreatitis due to chronic alcoholism             |
| O35.4 | <i>No alcohol-specific code available</i> | 199551008        | Maternal care for (suspected) damage to fetus from alcohol |

|       |                                                                |           |                                                                                 |
|-------|----------------------------------------------------------------|-----------|---------------------------------------------------------------------------------|
| P04.3 | 760.71                                                         | 36558000  | Fetal or neonatal effect of alcohol transmitted via placenta and/or breast milk |
|       |                                                                | 268796000 | Fetal or neonatal effect of placental or breast transfer of alcohol             |
|       |                                                                | 698321001 | Neonatal effect of alcohol transmitted via breast milk                          |
|       |                                                                | 205791004 | Fetal or neonatal effect of maternal use of alcohol                             |
|       |                                                                | 609438005 | Fetal or neonatal effect of maternal alcohol addiction                          |
| Q86.0 | Alcohol affecting fetus or newborn via placenta or breast milk | 609437000 | Fetal Alcohol Spectrum Disorder                                                 |
|       |                                                                | 205788004 | Fetal alcohol syndrome                                                          |
|       |                                                                | 205791004 | Fetal or neonatal effect of maternal use of alcohol                             |
|       |                                                                | 36558000  | Fetal or neonatal effect of alcohol transmitted via placenta and/or breast milk |
| R78.0 | 790.3                                                          | 442766007 | Alcohol in blood specimen above reference range                                 |
|       |                                                                | 442669008 | Ethanol in blood specimen above legal threshold for operating vehicle           |
|       |                                                                | 441685000 | Ethanol in blood specimen above reference range                                 |
|       |                                                                | 274776000 | Finding of alcohol in blood                                                     |
|       |                                                                | 207273009 | ^Alcohol blood level excessive (situation)                                      |
|       |                                                                | 160592001 | Alcohol intake above recommended sensible limits                                |
| T51   | 980                                                            | 216633005 | Accidental poisoning by alcoholic beverage                                      |
|       |                                                                | 216635003 | Accidental poisoning by denatured alcohol                                       |
|       |                                                                | 95906008  | Drug interaction with alcohol                                                   |
|       |                                                                | 287166006 | Accidental poisoning with ethyl alcohol                                         |
|       |                                                                | 442764005 | Poisoning by benzene                                                            |
|       |                                                                | 82782008  | Alcohol poisoning                                                               |
|       |                                                                | 212807002 | Grain alcohol causing toxic effect                                              |
|       |                                                                | 216636002 | Accidental poisoning by methylated spirit                                       |
|       |                                                                | 315226008 | Pain in lymph nodes after alcohol consumption                                   |
|       |                                                                | 89507002  | Toxic effect of denatured alcohol                                               |
|       |                                                                | 25966003  | Metabolic acidosis due to methanol                                              |
|       |                                                                | 212809004 | Methyl alcohol causing toxic effect                                             |

|     |      |           |                                                        |
|-----|------|-----------|--------------------------------------------------------|
|     |      | 216640006 | Accidental poisoning by methanol                       |
|     |      | 212813006 | Toxic effect of isopropyl alcohol                      |
|     |      | 6749002   | Toxic effect of propyl alcohol                         |
|     |      | 216645001 | Accidental poisoning by isopropyl alcohol              |
|     |      | 216648004 | Accidental poisoning by rubbing alcohol substitute     |
|     |      | 4953006   | Toxic effect of butyl alcohol                          |
|     |      | 6749002   | Toxic effect of propyl alcohol                         |
|     |      | 57346004  | Toxic effect of fusel oil                              |
|     |      | 216651006 | Accidental poisoning by fusel oil                      |
|     |      | 87460008  | Toxic effect of amyl alcohol                           |
|     |      | 67426006  | Toxic effect of alcohol                                |
|     |      | 82047000  | Diarrhoea due to alcohol intake                        |
|     |      | 314539001 | Alcohol related optic neuropathy                       |
|     |      | 269765000 | Accidental poisoning by alcohol                        |
|     |      | 212816003 | ^Rubbing alcohol causing toxic effect (disorder)       |
|     |      | 212817007 | ^Isopropyl alcohol causing toxic effect NOS (disorder) |
|     |      | 212818002 | ^Fusel oil causing toxic effect NOS (disorder)         |
|     |      | 212819005 | ^Other alcohol causing toxic effect (disorder)         |
|     |      | 212820004 | ^Alcohol causing toxic effect NOS (disorder)           |
|     |      | 213687005 | ^Toxic effect of other alcohols (disorder)             |
|     |      | 212815004 | ^Isopropanol causing toxic effect (disorder)           |
|     |      | 212814000 | ^Dimethyl carbinol causing toxic effect (disorder)     |
|     |      | 212811008 | ^Wood alcohol causing toxic effect (disorder)          |
|     |      | 212808007 | ^Ethyl alcohol causing toxic effect NOS (disorder)     |
|     |      | 212806006 | ^Ethyl alcohol causing toxic effect (disorder)         |
|     |      | 699208000 | Thrombocytopenia due to alcohol                        |
| X45 | E860 | 212813006 | Toxic effect of isopropyl alcohol                      |
|     |      | 216640006 | Accidental poisoning by methanol                       |
|     |      | 82782008  | Alcohol poisoning                                      |
|     |      | 216635003 | Accidental poisoning by denatured alcohol              |
|     |      | 6749002   | Toxic effect of propyl alcohol                         |
|     |      | 212809004 | Methyl alcohol causing toxic effect                    |
|     |      | 242263000 | Accidental exposure to alcohol                         |

|    |  |           |                                                                                                                                  |
|----|--|-----------|----------------------------------------------------------------------------------------------------------------------------------|
| 1  |  |           |                                                                                                                                  |
| 2  |  |           |                                                                                                                                  |
| 3  |  |           |                                                                                                                                  |
| 4  |  | 216633005 | Accidental poisoning by alcoholic beverage                                                                                       |
| 5  |  |           |                                                                                                                                  |
| 6  |  | 212813006 | Toxic effect of isopropyl alcohol                                                                                                |
| 7  |  |           |                                                                                                                                  |
| 8  |  | 242265007 | Accidental exposure to ethanol                                                                                                   |
| 9  |  |           |                                                                                                                                  |
| 10 |  | 278363000 | Alcoholic macrocytosis                                                                                                           |
| 11 |  |           |                                                                                                                                  |
| 12 |  | 442764005 | Poisoning by benzene                                                                                                             |
| 13 |  |           |                                                                                                                                  |
| 14 |  | 4953006   | Toxic effect of butyl alcohol                                                                                                    |
| 15 |  |           |                                                                                                                                  |
| 16 |  | 287166006 | Accidental poisoning with ethyl alcohol                                                                                          |
| 17 |  |           |                                                                                                                                  |
| 18 |  | 699208000 | Thrombocytopenia due to alcohol                                                                                                  |
| 19 |  |           |                                                                                                                                  |
| 20 |  | 212809004 | Methyl alcohol causing toxic effect                                                                                              |
| 21 |  |           |                                                                                                                                  |
| 22 |  | 67426006  | Toxic effect of alcohol                                                                                                          |
| 23 |  |           |                                                                                                                                  |
| 24 |  | 6749002   | Toxic effect of propyl alcohol                                                                                                   |
| 25 |  |           |                                                                                                                                  |
| 26 |  | 216645001 | Accidental poisoning by isopropyl alcohol                                                                                        |
| 27 |  |           |                                                                                                                                  |
| 28 |  | 89507002  | Toxic effect of denatured alcohol                                                                                                |
| 29 |  |           |                                                                                                                                  |
| 30 |  | 212807002 | Grain alcohol causing toxic effect                                                                                               |
| 31 |  |           |                                                                                                                                  |
| 32 |  | 216648004 | Accidental poisoning by rubbing alcohol substitute                                                                               |
| 33 |  |           |                                                                                                                                  |
| 34 |  | 216651006 | Accidental poisoning by fusel oil                                                                                                |
| 35 |  |           |                                                                                                                                  |
| 36 |  | 216636002 | Accidental poisoning by methylated spirit                                                                                        |
| 37 |  |           |                                                                                                                                  |
| 38 |  | 89507002  | Toxic effect of denatured alcohol                                                                                                |
| 39 |  |           |                                                                                                                                  |
| 40 |  | 442764005 | Poisoning by benzene                                                                                                             |
| 41 |  |           |                                                                                                                                  |
| 42 |  | 87460008  | Toxic effect of amyl alcohol                                                                                                     |
| 43 |  |           |                                                                                                                                  |
| 44 |  | 269765000 | Accidental poisoning by alcohol                                                                                                  |
| 45 |  |           |                                                                                                                                  |
| 46 |  | 57346004  | Toxic effect of fusel oil                                                                                                        |
| 47 |  |           |                                                                                                                                  |
| 48 |  | 221843007 | ^Accidental poisoning by and exposure to alcohol, occurrence at home (event)                                                     |
| 49 |  |           |                                                                                                                                  |
| 50 |  | 221844001 | ^Accidental poisoning by and exposure to alcohol, occurrence in residential institution (event)                                  |
| 51 |  |           |                                                                                                                                  |
| 52 |  | 221845000 | ^Accidental poisoning by and exposure to alcohol, occurrence at school, other institution and public administrative area (event) |
| 53 |  |           |                                                                                                                                  |
| 54 |  | 221846004 | ^Accidental poisoning by and exposure to alcohol, occurrence at sports and athletics area (event)                                |
| 55 |  |           |                                                                                                                                  |
| 56 |  | 221847008 | ^Accidental poisoning by and exposure to alcohol, occurrence on street and highway (event)                                       |
| 57 |  |           |                                                                                                                                  |
| 58 |  | 221848003 | ^Accidental poisoning by and exposure to alcohol, occurrence at trade and service area (event)                                   |
| 59 |  |           |                                                                                                                                  |
| 60 |  |           |                                                                                                                                  |

|                                                                                                                                     |                                    |           |                                                                                                                                        |
|-------------------------------------------------------------------------------------------------------------------------------------|------------------------------------|-----------|----------------------------------------------------------------------------------------------------------------------------------------|
|                                                                                                                                     |                                    | 221849006 | ^Accidental poisoning by and exposure to alcohol, occurrence at industrial and construction area (event)                               |
|                                                                                                                                     |                                    | 221850006 | ^Accidental poisoning by and exposure to alcohol, occurrence on farm (event)                                                           |
|                                                                                                                                     |                                    | 221851005 | ^Accidental poisoning by and exposure to alcohol, occurrence at other specified place (event)                                          |
|                                                                                                                                     |                                    | 221852003 | ^Accidental poisoning by and exposure to alcohol, occurrence at unspecified place (event)                                              |
|                                                                                                                                     |                                    | 57346004  | Toxic effect of fusel oil                                                                                                              |
| X65 (note that no generalised mapping matches were available with SNO-MED although lexical matching suggest use of the above codes) | No alcohol-specific code available | 222103001 | ^Intentional self-poisoning by and exposure to alcohol (event)                                                                         |
|                                                                                                                                     |                                    | 222104007 | ^Intentional self-poisoning by and exposure to alcohol, occurrence at home (event)                                                     |
|                                                                                                                                     |                                    | 222105008 | ^Intentional self-poisoning by and exposure to alcohol, occurrence in residential institution (event)                                  |
|                                                                                                                                     |                                    | 222106009 | ^Intentional self-poisoning by and exposure to alcohol, occurrence at school, other institution and public administrative area (event) |
|                                                                                                                                     |                                    | 222107000 | ^Intentional self-poisoning by and exposure to alcohol, occurrence at sports and athletics area (event)                                |
|                                                                                                                                     |                                    | 222108005 | ^Intentional self-poisoning by and exposure to alcohol, occurrence on street and highway (event)                                       |
|                                                                                                                                     |                                    | 222110007 | ^Intentional self-poisoning by and exposure to alcohol, occurrence at trade and service area (event)                                   |
|                                                                                                                                     |                                    | 222111006 | ^Intentional self-poisoning by and exposure to alcohol, occurrence at industrial and construction area (event)                         |

|     |      |           |                                                                                                                                            |
|-----|------|-----------|--------------------------------------------------------------------------------------------------------------------------------------------|
|     |      | 222112004 | ^Intentional self-poisoning by and exposure to alcohol, occurrence on farm (event)                                                         |
|     |      | 222113009 | ^Intentional self-poisoning by and exposure to alcohol, occurrence at other specified place (event)                                        |
|     |      | 222114003 | ^Intentional self-poisoning by and exposure to alcohol, occurrence at unspecified place (event)                                            |
|     |      | 312963001 | Methanol retinopathy                                                                                                                       |
| Y15 | E860 | 222702003 | ^Poisoning by and exposure to alcohol, undetermined intent (event)                                                                         |
|     | 980  | 222703008 | ^Poisoning by and exposure to alcohol, occurrence at home, undetermined intent (event)                                                     |
|     |      | 222704002 | ^Poisoning by and exposure to alcohol, occurrence in residential institution, undetermined intent (event)                                  |
|     |      | 222705001 | ^Poisoning by and exposure to alcohol, occurrence at school, other institution and public administrative area, undetermined intent (event) |
|     |      | 222706000 | ^Poisoning by and exposure to alcohol, occurrence at sports and athletics area, undetermined intent (event)                                |
|     |      | 222707009 | ^Poisoning by and exposure to alcohol, occurrence on street and highway, undetermined intent (event)                                       |
|     |      | 222708004 | ^Poisoning by and exposure to alcohol, occurrence at trade and service area, undetermined intent (event)                                   |
|     |      | 222709007 | ^Poisoning by and exposure to alcohol, occurrence at industrial and construction area, undetermined intent (event)                         |
|     |      | 222710002 | ^Poisoning by and exposure to alcohol, occurrence on farm, undetermined intent (event)                                                     |
|     |      | 222711003 | ^Poisoning by and exposure to alcohol, occurrence at other specified place, undetermined intent (event)                                    |

|                                                                                                                                                            |                                    |           |                                                                                                                     |
|------------------------------------------------------------------------------------------------------------------------------------------------------------|------------------------------------|-----------|---------------------------------------------------------------------------------------------------------------------|
|                                                                                                                                                            |                                    | 222713000 | ^Poisoning by and exposure to alcohol, occurrence at unspecified place, undetermined intent (event)                 |
|                                                                                                                                                            |                                    | 274776000 | Finding of alcohol in blood                                                                                         |
| Y90 (note that no generalised mapping matches were available with SNO-MED although lexical matching suggest use of the 'Finding of alcohol in blood' code) | No alcohol-specific code available | 223333005 | ^Evidence of alcohol involvement determined by blood alcohol level (navigational concept)                           |
|                                                                                                                                                            |                                    | 223334004 | ^Evidence of alcohol involvement determined by blood alcohol level of less than 20 mg/100 ml (navigational concept) |
|                                                                                                                                                            |                                    | 223335003 | ^Evidence of alcohol involvement determined by blood alcohol level of 20-39 mg/100 ml (navigational concept)        |
|                                                                                                                                                            |                                    | 223336002 | ^Evidence of alcohol involvement determined by blood alcohol level of 40-59 mg/100 ml (navigational concept)        |
|                                                                                                                                                            |                                    | 223337006 | ^Evidence of alcohol involvement determined by blood alcohol level of 60-79 mg/100 ml (navigational concept)        |
|                                                                                                                                                            |                                    | 223338001 | ^Evidence of alcohol involvement determined by blood alcohol level of 80-99 mg/100 ml (navigational concept)        |
|                                                                                                                                                            |                                    | 223339009 | ^Evidence of alcohol involvement determined by blood alcohol level of 100-119 mg/100 ml (navigational concept)      |
|                                                                                                                                                            |                                    | 223340006 | ^Evidence of alcohol involvement determined by blood alcohol level of 120-199 mg/100 ml (navigational concept)      |
|                                                                                                                                                            |                                    | 223341005 | ^Evidence of alcohol involvement determined by blood alcohol level                                                  |

|                                                                                                                                                                       |                                    |           |                                                                                                                               |
|-----------------------------------------------------------------------------------------------------------------------------------------------------------------------|------------------------------------|-----------|-------------------------------------------------------------------------------------------------------------------------------|
|                                                                                                                                                                       |                                    |           | of 200-239 mg/100 ml (navigational concept)                                                                                   |
|                                                                                                                                                                       |                                    | 223342003 | ^Evidence of alcohol involvement determined by blood alcohol level of 240 mg/100 ml or more (navigational concept)            |
|                                                                                                                                                                       |                                    | 223343008 | ^Evidence of alcohol involvement determined by presence of alcohol in blood, level not specified (navigational concept)       |
|                                                                                                                                                                       |                                    | 25702006  | Alcohol intoxication                                                                                                          |
| Y91 (note that generalised mapping matches were only available for Y91.1 and Y91.9 with SNO-MED although lexical matching suggest use of 'Alcohol intoxication' code) | No alcohol-specific code available | 230800004 | Alcoholic coma                                                                                                                |
|                                                                                                                                                                       |                                    | 82047000  | Diarrhoea due to alcohol intake                                                                                               |
|                                                                                                                                                                       |                                    | 361267005 | Alcohol-related fit                                                                                                           |
|                                                                                                                                                                       |                                    | 223344002 | ^Evidence of alcohol involvement determined by level of intoxication (navigational concept)                                   |
|                                                                                                                                                                       |                                    | 223345001 | ^Evidence of alcohol involvement determined by level of intoxication, mild alcohol intoxication (navigational concept)        |
|                                                                                                                                                                       |                                    | 223346000 | ^Evidence of alcohol involvement determined by level of intoxication, moderate alcohol intoxication (navigational concept)    |
|                                                                                                                                                                       |                                    | 223347009 | ^Evidence of alcohol involvement determined by level of intoxication, severe alcohol intoxication (navigational concept)      |
|                                                                                                                                                                       |                                    | 223348004 | ^Evidence of alcohol involvement determined by level of intoxication, very severe alcohol intoxication (navigational concept) |



1  
2  
3  
4  
5  
6  
7  
8  
9  
10  
11  
12  
13  
14  
15  
16  
17  
18  
19  
20  
21  
22  
23  
24  
25  
26  
27  
28  
29  
30  
31  
32  
33  
34  
35  
36  
37  
38  
39  
40  
41  
42  
43  
44  
45  
46  
47  
48  
49  
50  
51  
52  
53  
54  
55  
56  
57  
58  
59  
60

|  |  |           |                                                                                                                                           |
|--|--|-----------|-------------------------------------------------------------------------------------------------------------------------------------------|
|  |  | 223349007 | ^Evidence of alcohol involvement determined by level of intoxication, alcohol involvement, not otherwise specified (navigational concept) |
|--|--|-----------|-------------------------------------------------------------------------------------------------------------------------------------------|

For peer review only

## References

1. Toson B, Harvey LA, Close JC. New ICD-10 version of the Multipurpose Australian Comorbidity Scoring System outperformed Charlson and Elixhauser comorbidities in an older population. *J Clin Epidemiol* 2016;79:62-69. doi: 10.1016/j.jclinepi.2016.04.004 [published Online First: 2016/04/23]
2. Preen DB, Holman CD, Spilsbury K, et al. Length of comorbidity lookback period affected regression model performance of administrative health data. *J Clin Epidemiol* 2006;59(9):940-6. doi: 10.1016/j.jclinepi.2005.12.013 [published Online First: 2006/08/10]
3. NSW. *laPC. Statutory Guidelines on Research: Health Records and Information Privacy Act 2002 (NSW)*. 2002
4. Chikritzhs TC, P.; Stockwell, T.; Donath, S.; Ngo, H.; Young, D. and Mathews, S. *Australian alcohol indicators, 1990-2001: Patterns of alcohol use and related harms for Australian states and territories*. : Curtin University of Technology: National Drug Research Institute, 2003.

# BMJ Open

**Protocol for the Data-linkage Alcohol Cohort Study (DACS):  
Investigating mortality, morbidity, and offending among  
people with an alcohol-related problem using linked  
administrative data**

|                                 |                                                                                                                                                                                                                                                                                                                                                                                                                                                                                                                                                                                                           |
|---------------------------------|-----------------------------------------------------------------------------------------------------------------------------------------------------------------------------------------------------------------------------------------------------------------------------------------------------------------------------------------------------------------------------------------------------------------------------------------------------------------------------------------------------------------------------------------------------------------------------------------------------------|
| Journal:                        | <i>BMJ Open</i>                                                                                                                                                                                                                                                                                                                                                                                                                                                                                                                                                                                           |
| Manuscript ID                   | bmjopen-2019-030605.R1                                                                                                                                                                                                                                                                                                                                                                                                                                                                                                                                                                                    |
| Article Type:                   | Protocol                                                                                                                                                                                                                                                                                                                                                                                                                                                                                                                                                                                                  |
| Date Submitted by the Author:   | 05-Jun-2019                                                                                                                                                                                                                                                                                                                                                                                                                                                                                                                                                                                               |
| Complete List of Authors:       | Peacock, Amy; University of New South Wales, National Drug and Alcohol Research Centre;<br>Chiu, Vivian; University of Queensland, School of Psychology<br>Leung, Janni; University of Queensland, School of Medicine<br>Dobbins, Timothy<br>Larney, Sarah; University of NSW, National Drug and Alcohol Research Centre<br>Gisev, Natasa; University of New South Wales, National Drug and Alcohol Research Centre<br>Pearson, Sallie-Anne; University of New South Wales, Medicines Policy Research Unit<br>Degenhardt, Louisa; University of New SouthWales, National Drug and Alcohol Research Centre |
| <b>Primary Subject Heading</b>: | Epidemiology                                                                                                                                                                                                                                                                                                                                                                                                                                                                                                                                                                                              |
| Secondary Subject Heading:      | Mental health, Epidemiology                                                                                                                                                                                                                                                                                                                                                                                                                                                                                                                                                                               |
| Keywords:                       | alcohol, data linkage, mortality, morbidity, incarceration, offending                                                                                                                                                                                                                                                                                                                                                                                                                                                                                                                                     |
|                                 |                                                                                                                                                                                                                                                                                                                                                                                                                                                                                                                                                                                                           |

SCHOLARONE™  
Manuscripts

1  
2  
3  
4  
5  
6 **Protocol for the Data-linkage Alcohol Cohort Study (DACS): Investigating mortality, morbidity, and**  
7 **offending among people with an alcohol-related problem using linked administrative data**  
8  
9

10  
11 Amy Peacock<sup>1,2</sup>, Vivian Chiu<sup>1,3,4</sup>, Janni Leung<sup>1,3,4,5</sup>, Timothy Dobbins<sup>1</sup>, Sarah Larney<sup>1</sup>, Natasa Gisev<sup>1</sup>,  
12 Sallie-Anne Pearson<sup>6</sup>, & Louisa Degenhardt<sup>1</sup>  
13

14  
15 <sup>1</sup>National Drug and Alcohol Research Centre, University of New South Wales Sydney, Australia  
16

17 <sup>2</sup>Division of Psychology, School of Medicine, University of Tasmania, Australia  
18

19 <sup>3</sup>School of Psychology, Brisbane, The University of Queensland, Australia  
20

21 <sup>4</sup>Centre for Youth Substance Abuse Research, Brisbane, The University of Queensland, Australia  
22

23 <sup>5</sup>Institute for Health Metrics and Evaluation, University of Washington, United States  
24

25 <sup>6</sup>Centre for Big Data Research in Health, University of New South Wales Sydney, Australia  
26  
27  
28  
29  
30  
31  
32  
33  
34  
35  
36  
37  
38  
39  
40  
41  
42  
43  
44  
45  
46  
47  
48  
49  
50  
51  
52  
53  
54  
55  
56  
57  
58  
59  
60

**Word Count:** 2469

**Corresponding author:** Amy Peacock, Research Fellow, National Drug and Alcohol Research Centre,  
University of New South Wales, e: [amy.peacock@unsw.edu.au](mailto:amy.peacock@unsw.edu.au), t: +61 2 9385 0333, f: +61 2 9385 0222.

## Abstract

**Introduction:** The aims of this program of research are to use linked health and law enforcement data to describe individuals presenting to emergency and inpatient health care services with an acute alcohol harm or problematic alcohol use; measure their health service utilisation and law enforcement engagement; and quantify morbidity, mortality, offending and incarceration.

**Methods and analysis:** We will assemble a retrospective cohort of people presenting to emergency departments and/or admitted to hospitals between January 1<sup>st</sup>, 2005 and December 31<sup>st</sup>, 2014 in New South Wales, Australia with a diagnosis denoting an acute alcohol harm or problematic alcohol use. We will link their hospital data with records from other healthcare services (e.g., community-based mental health care provision, cancer registry), mortality, offending, and incarceration data sets. The four overarching areas for analysis comprise: i) describing the characteristics of those presenting to emergency and inpatient hospital services with a diagnosis indicating an acute alcohol harm and/or problematic alcohol use at first point of contact within the cohort period; ii) quantifying health service utilisation and law enforcement engagement; iii) quantifying rates of mortality, morbidity, offending and incarceration; and iii) assessing predictors (e.g., age, sex) of mortality, morbidity, offending, and incarceration amongst this cohort.

**Ethics and dissemination:** Ethics approval has been provided by the New South Wales Population and Health Services Research Ethics Committee. We will report our findings in accordance with the Reporting of studies Conducted using Observational Routinely-collected health Data statement (RECORD) and Guidelines for Accurate and Transparent Health Estimates Reporting (GATHER) where appropriate. We will publish data in tabular, aggregate forms only. We will not disclose individual results. We will disseminate project findings at scientific conferences and in peer-review journals. We will aim to present findings to relevant stakeholders (e.g., addiction medicine, emergency medicine, policy makers) to maximise translational impact of research findings.

**Keywords:** alcohol; data linkage; mortality; morbidity; incarceration; offending; harm

## STRENGTHS AND LIMITATIONS OF THIS STUDY

### Strengths:

- This study comprises a population-based cohort of people with a diagnosis indicating an acute alcohol problem and/or problematic alcohol use (as identified through emergency department attendances and hospital separations) over an extended period (2005-2014).
- There is a wealth of information on these participants through linkage to various routinely-collected administrative data sets (i.e., emergency department presentations, hospital separations, cancer notifications, mental health ambulatory care, mortality, offending, and incarceration).

### Limitations:

- Routinely-collected administrative data contain limited contextual information and represent an underestimate of total health and offending outcomes for these individuals (e.g., where not brought to the attention of, and recorded by, these services).
- Intervention and treatment for alcohol-related problems are not wholly captured across these data sources, and may impact experiences of morbidity, mortality, offending and incarceration.
- The study period represents a snapshot for each individual; some individuals may have an extensive history of engagement with healthcare and law enforcement prior to entry to the cohort but this cannot necessarily be identified with the data used here.

## Introduction

Reducing the health, social, and economic burden of alcohol use is a priority in Australia and globally<sup>1,2</sup>. Alcohol consumption is estimated to play a causal role in over 200 disease and injury conditions<sup>2</sup>. Approximately 3.9% of deaths and 1.8% of hospitalisations in Australia are alcohol-related<sup>3</sup>. Alcohol use negatively impacts on the community through reduced workplace productivity, traffic accidents, family problems, crime, and public disorder, with an estimated economic cost of \$14 billion annually<sup>4</sup>.

Recent evidence suggests declining population levels of consumption in Australia over the past two decades without clear evidence of a corresponding decrease in harms<sup>5-9</sup>. Alcohol-related harms represent a significant burden on healthcare and law enforcement services. Indeed, recent estimates suggest that approximately one in ten emergency department presentations in Australia are alcohol-related<sup>10</sup>, with more than 144,000 alcohol-attributable hospitalisations in Australia in 2012/13<sup>11</sup>.

The aforementioned data are based on modeled estimates or on aggregated number of presentations to services. It is important to understand these events at the individual level: a significant proportion of people will have recurrent alcohol-related problems and experience substantial morbidity and higher risk of mortality as a consequence, placing a significant burden on healthcare and law enforcement services. In Australia, there has been no recent attempt at the population level to longitudinally track people with alcohol-related problems to measure overall mortality, morbidity and other problems (e.g., offending and incarceration), despite such work for other substances (e.g., opioids<sup>12</sup>).

This project, named the Data linkage Alcohol Cohort Study (DACs), will use data linkage to identify individuals presenting to emergency department or inpatient hospital services in New South Wales (NSW), Australia, with a diagnosis indicating an acute alcohol harm or problematic use. Records for this cohort of people will be linked to additional health and law enforcement service data for robust measurement of alcohol-related harms and burden. The overarching objectives of this program of research are to:

1. Describe the cohort at their first point of contact with emergency department or inpatient hospital services within the study period for an acute alcohol harm and/or problematic alcohol use;
2. Quantify healthcare service utilisation and law enforcement engagement among the cohort (and associated economic costs) and assess individual and situational characteristics as predictors of frequency of engagement;

3. Quantify the rate of mortality, morbidity, offending and incarceration amongst the cohort, looking at overall rates and cause-specific outcomes where possible; and
4. Assess individual and situational characteristics as predictors of mortality, morbidity, offending and incarceration.

## Methods and Analysis

### Study Design

This study will link two routinely collected administrative datasets from NSW, Australia, to assemble a retrospective observational cohort of people presenting to emergency department and hospital inpatient services with an acute alcohol harm and/or problematic alcohol use. Once the cohort has been identified, their linked data from other routinely-collected administrative data sets will be extracted, providing information on emergency department presentations, hospital separations, cancer notifications, mental health ambulatory care, mortality, offending, and incarceration. Data linkage will be undertaken by the Centre for Health Record Linkage (CHeReL).

### Formation of Base Cohort

The base cohort will consist of individuals with a diagnosis indicating an acute alcohol harm or problematic alcohol use presenting to inpatient services (NSW Admitted Patient Data Collection; NSW APDC) and acute services (NSW Emergency Department Data Collection; NSW EDDC) in NSW between January 1<sup>st</sup>, 2005 and December 31<sup>st</sup>, 2014. Diagnostic classification systems used by NSW APDC and NSW EDDC in this period comprise the International Classification of Diseases and Health Related Problems 9<sup>th</sup> and 10<sup>th</sup> edition Australian Modification (ICD-9-CM or ICD-10-AM; APDC and EDDC) and the Systematized Nomenclature of Medicine--Clinical Terms Australian Modification (SNOMED-CT-AU; EDDC only). Diagnostic codes used for cohort inclusion were identified through a review of various sources on alcohol-related health burden and mortality (e.g., Chikritzhs, et al. <sup>13</sup>) and in consultation with specialists in the field (see **Table 1** for ICD-10 codes; see **Appendix 1** for all the diagnosis codes used for cohort identification). A flowchart of how the base cohort will be formed and the administrative datasets to be linked (described in the next section) is presented in **Figure 1**. Inclusion in the cohort may be modified depending on the specific research question being addressed.

\*Table 1 approximately here\*

\*Figure 1 approximately here\*

### Datasets and Linkage



1  
2  
3 On identifying the base cohort, the CHeReL will extract linked data for these individuals from a range  
4 of routinely-collected administrative data sets using the probabilistic record linkage software  
5 ChoiceMaker<sup>14,15</sup>. Identifying information (i.e., name, address, date of birth and gender) for each  
6 dataset is included in the Master Linkage Key (MLK) constructed by the CHeReL. The ChoiceMaker  
7 software uses an exact 'blocking' algorithm to search for valid matches in the MLK to identify all  
8 matching records. A combination of two techniques is used to determine whether each potential  
9 match denotes (or possibly denotes) the same person, comprising: i) a probabilistic decision, which is  
10 computed using a machine learning technique, and ii) absolute rules, which include upper and lower  
11 probability cut-offs which initially start at 0.75 and 0.25 for a linkage and are adjusted for each  
12 individual linkage to ensure false links are minimised. The parameters for the extract from the MLK  
13 are set such that no true matches are missed if full identifiers are available. Extensive quality assurance  
14 measures ensure the false positive rate for linkage is less than 0.5% and the false negative rate for  
15 linkage is less than 0.1%<sup>15</sup>. All datasets except the NSW Re-offending Database (ROD) are routinely  
16 contained within the MLK. The internal matching process of the NSW Re-offending Database (ROD)  
17 has been validated (specificity of 99.9 percent and a sensitivity of 93.8 percent<sup>16</sup>), and linkage of  
18 records within the MLK to those within ROD will follow the same process as above. Descriptions of the  
19 data sets for linkage are presented in **Table 2**.

20  
21  
22  
23  
24  
25  
26  
27  
28  
29  
30  
31  
32 \*Table 2 approximately here\*

### 33 34 35 **Patient and public involvement**

36  
37 Patients and the public were not involved in the design of the study. As described in our dissemination  
38 activities (outlined below), we will aim to present findings to relevant stakeholders (e.g., addiction  
39 medicine, emergency medicine, policy makers) to maximise translational impact of research findings.  
40 We will prepare one-page summaries of key findings for distribution to drug treatment services and  
41 harm-reduction services.  
42  
43  
44

### 45 46 **Planned statistical analyses**

47  
48 Below, we outline the core analyses to address the overarching research questions. In all analyses,  
49 multiple confounding variables will be controlled as appropriate. We will also undertake the below  
50 analyses for the total cohort and focused specifically on young people (e.g., aged 15-24 years old). This  
51 younger age demographic has demonstrated significant recent shifts in alcohol consumption  
52 alongside increasing harms<sup>7,8</sup>, and also represents a portion of the sample likely to have no or limited  
53 engagement with healthcare and law enforcement services prior to the study period.  
54  
55  
56  
57  
58  
59  
60

1  
2  
3 **Aim 1. Describe the cohort at their first point of contact with emergency department or inpatient**  
4 **hospital services within the study period for an acute alcohol harm and/or problematic alcohol use.**

5  
6  
7 We will describe the characteristics of the cohort at their index event (i.e., first emergency department  
8 presentation or hospital separation with an alcohol-related diagnosis within the cohort period;  
9 diagnosis codes identified in **Appendix 1**). Our description will include the individual characteristics  
10 (e.g., age, sex, socio-economic status) and situational characteristics (e.g., public or private hospital,  
11 diagnosis) of their presentation. We will analyse the 12-month period prior to each person's index  
12 presentation to quantify existing health comorbidities (using an established comorbidity score, e.g.,  
13 Charlson Comorbidity Index<sup>17</sup> or Elixhauser Comorbidity Index<sup>18</sup>), as well as offending and  
14 incarceration within that period. For these analyses, we will exclude individuals who had an index  
15 event within the first 12 months of the cohort commencement (i.e., between January 1<sup>st</sup> and  
16 December 31<sup>st</sup>, 2005) to provide capacity for analyses of the 12-month period prior to index  
17 presentation.  
18  
19  
20  
21  
22  
23  
24  
25

26 **Aim 2. Quantify healthcare service utilisation and law enforcement engagement among the cohort**  
27 **(and associated economic costs) and assess individual and situational characteristics as predictors**  
28 **of frequency of engagement.**

29  
30  
31 We will calculate total number of emergency department presentations and hospital separations each  
32 year, and number of unique people each year with an emergency department presentation/hospital  
33 separation with an alcohol-related diagnosis. We will estimate the number of hospital separations in  
34 two ways, as a count of episodes of care and of periods of stay<sup>19</sup>. A period of stay will be defined as  
35 the complete period of care from admission to hospital until separation. A period of stay may consist  
36 of multiple episodes of care, the latter defined as a period of a specific care type (e.g., receipt of acute  
37 care and rehabilitation may be coded as two episodes-of-care within one period-of-stay).  
38  
39

40 We will identify people who re-present to these services within 30 days of discharge (re-admission),  
41 as well as those individuals who attend at high-frequency ( $\geq 4$  presentations/separations in a year) and  
42 high-intensity (average  $\geq 4$  presentations/separations in a year across period of follow-up or until  
43 death). We will use regression analyses to assess individual and situational characteristics of re-  
44 admission, high-frequency attendance, and high-intensity attendance. We will quantify engagement  
45 with law enforcement (offending and incarceration). We will also estimate costs associated with  
46 health service utilisation and law enforcement engagement using standard reference material for  
47 costs (e.g. Australian Refined Diagnosis Related Group (AR-DRG) codes for quantification of economic  
48 cost of hospital services<sup>20</sup>).  
49  
50  
51  
52  
53  
54  
55  
56  
57  
58  
59  
60

1  
2  
3 **Aim 3. Quantify the rate of mortality, morbidity, offending and incarceration amongst the cohort,**  
4 **looking at overall rates and cause-specific outcomes where possible. Aim 4. Assess individual and**  
5 **situational characteristics as predictors of mortality, morbidity, offending and incarceration.**  
6  
7

8  
9 **Mortality analyses.** We will calculate all-cause and cause-specific crude mortality rates as the number  
10 of deaths in the cohort divided by person-years of observation. We will estimate all-cause and cause-  
11 specific standardised mortality ratios by comparing the observed number of deaths and expected  
12 number of deaths. We will classify deaths in accordance with guidance for clustering major causes of  
13 mortality<sup>21</sup>, with a focus on causes of death wholly or partly attributable to alcohol consumption<sup>22</sup>.  
14 We will stratify crude mortality rates and standardised mortality ratios by other demographic and  
15 situational characteristics where possible based on population data (e.g., age, geography, sex,  
16 comorbidity). We will conduct survival analyses to determine time from the index presentation to the  
17 outcome of interest (mortality or, if mortality does not occur, the censoring date) and use Cox  
18 proportional hazards regression to calculate hazard ratios for all-cause and cause-specific mortality  
19 based on time-independent (e.g., gender) and time-dependent (e.g., age, calendar year, geographic  
20 region, comorbidity score) variables.  
21  
22

23  
24  
25  
26  
27  
28  
29 **Morbidity analyses.** The main outcome of interest will be time (measured by the number of days)  
30 between presentations. Individuals will be censored at the end of the study period or date of death,  
31 whichever occurred first. We will use survival analysis methods that incorporate multiple observations  
32 per person<sup>23</sup> to examine the relationship between risk factors (individual and situational  
33 characteristics at index) and the time interval distributions of recurrent presentations with multiple  
34 causes for each individual. We will examine any re-admission and alcohol-related re-admission, as well  
35 as time to specific type of alcohol-related re-admission (as defined in Table 1). Risk factors will be  
36 identified for the entire cohort, adjusting for diagnostic groups. We will assess heterogeneity between  
37 diagnostic groups in the effect of risk factors descriptively. We will use the community-based mental  
38 health treatment data (MH-AMB) to undertake a sub-group analysis of people with comorbid mental  
39 health issues.  
40  
41

42  
43  
44  
45  
46  
47  
48 **Offending and incarceration analyses.** To assess frequency of engagement with the criminal justice  
49 system among individuals with problematic use of alcohol, we will calculate rates of all offences and  
50 alcohol-related offences per 1,000 person-years, as well as rates of incarceration episodes and time  
51 between offences (or death or end of follow-up, whichever comes first) distinguished by the  
52 characteristics of individuals (e.g. gender). Offences will be classified in accordance with the  
53 Australian and New Zealand Standard Offence Classification (ANZSOC) system<sup>24</sup> (as per the NSW  
54 Bureau of Crime Statistics and Research (BOCSAR) standard crime statistics reporting<sup>25</sup>).  
55  
56  
57  
58  
59  
60

1  
2  
3 We will use survival analysis methods to examine the relationship between engagement with health  
4 services (characterised by number of alcohol-related presentations) and time to a subsequent arrest  
5 (days to any offence/ days to alcohol-related offence). The hazard ratios for subsequent arrest will be  
6 adjusted for time-independent (e.g., gender, country of birth) and time-dependent (e.g., age,  
7 comorbidity score, calendar year, length of hospital stay, geographic region, private/public hospital,  
8 types of procedures undergone, remoteness, socio-economic status) variables.  
9  
10  
11  
12

### 13 14 **Methodological considerations**

15  
16 There are several key methodological considerations to be noted with the use of these data sets.  
17 Firstly, the number of participating emergency departments has intermittently increased over time,  
18 from around 46 emergency departments in 1996 to around 90 in 2010<sup>26</sup>. There are around 150  
19 emergency departments in NSW. Those servicing larger proportions of the NSW population are  
20 included but possible under-ascertainment of total engagement with emergency departments for  
21 alcohol-related problems should be noted. Where necessary, we will run analyses with and without  
22 the EDs that were added later in the series to establish if this has changed the study outcomes to  
23 account for variable data quality from inclusion of new participating emergency departments in the  
24 EDDC. Secondly, variation in computer programs and management practices at emergency  
25 departments and hospitals may lead to variation in diagnosis coding practices (i.e. ICD-9, ICD-10 and  
26 SNOMED codes entered by physicians) and in the screening and capture of alcohol involvement in  
27 healthcare presentations. Hence, the specificity of some disease categories may vary, and under-  
28 ascertainment of alcohol-related presentations is likely<sup>27</sup>. Thirdly, data on alcohol consumption, as  
29 well as intervention and treatment for problematic alcohol use, cannot be systematically ascertained  
30 from the included data sources. The MH-AMB captures ambulatory mental health service provided to  
31 non-admitted individuals. To the authors' knowledge, this data set has not been used to quantify  
32 engagement in prevention and intervention for alcohol-related problems in previous linkage studies.  
33 Until we have the capacity to study the data, we cannot know the quality of information provided  
34 however, there may be the capacity to explore use of this data set to capture such engagement, and  
35 take this into consideration in analyses. Fourthly, the false positive rate for linkage is less than 0.5%  
36 and the false negative rate for linkage is less than 0.1%<sup>15</sup>. We will compare time-independent  
37 information (e.g., date of birth, date of death) across datasets to identify inconsistencies that may be  
38 indicative of false positive linkages. These participants will be excluded from the cohort and identified  
39 in all reporting on final cohort composition. Finally, the study period represents a snapshot for each  
40 individual. Some individuals may have an extensive history of engagement with healthcare and law  
41 enforcement prior to entry to the cohort; this will be considered when drawing inferences from  
42 findings.  
43  
44  
45  
46  
47  
48  
49  
50  
51  
52  
53  
54  
55  
56  
57  
58  
59  
60

## Ethics and Dissemination

### Data storage, retention, and access

To protect privacy and confidentiality, approval for the linkage of health data in NSW is provided under strict conditions for the storage, retention and use of the data. The current approval permits storage of the data at three sites: the University of New South Wales, University of Queensland, and University of Tasmania.

### Ethics and Dissemination

Ethical approval for this project has been provided by the New South Wales Population and Health Services Research Ethics Committee (2016/08/650). Data custodian approval has been granted and linkage and data cleaning have nearly been completed, with data analyses being performed and reporting occurring whilst the project retains ethical approval (currently until 2021). We will report our findings in accordance with the Reporting of studies Conducted using Observational Routinely-collected health Data statement (RECORD)<sup>28</sup> and Guidelines for Accurate and Transparent Health Estimates Reporting (GATHER)<sup>29</sup> where appropriate. We will publish data in tabular, aggregate forms only and cells containing data from less than 10 participants will be suppressed. We will not disclose individual results.

We will disseminate project findings at scientific conferences and in peer-review journals. We will aim to present findings to relevant stakeholders (e.g., addiction medicine, emergency medicine, policy makers) to maximise translational impact of research findings.

### Discussion

This program of research will provide a comprehensive population-level understanding of the burden of problematic alcohol use on individuals and on healthcare and law enforcement services. It will extend knowledge of individual and situational factors that predict adverse alcohol-related outcomes, with the capacity to inform personalised intervention. The patterns of healthcare utilisation will also improve our knowledge of patient needs to enhance healthcare delivery for targeted populations. The multi-dimensional measurement of diverse events produced by this project can better reflect the scale and impact of alcohol-related problems which may be under-ascertained in the study of a single dataset.

1  
2  
3 **Authors' contributions:** AP and LD conceived the study idea. AP, LD, TD, NG, SL, SAP, and AD provided  
4 input to the study design and research questions. AP, TD, VC, and JL developed the statistical analysis  
5 plan. AP, VC, and JL completed the first draft of the manuscript. All authors reviewed the manuscript  
6 and provided input to the final draft.  
7  
8  
9

10  
11 **Funding statement:** This work was funded by research support funds awarded by UNSW Sydney to  
12 AP. AP, SL and LD are supported by NHMRC research fellowships (#1109366, #1140938 and  
13 #1041472/#1135991). SL and NG are supported by UNSW Scientia Fellowships. SL and LD are  
14 supported by NIH grant NIDA R01DA1104470. The National Drug and Alcohol Research Centre is  
15 supported by funding from the Australian Government Department of Health under the Drug and  
16 Alcohol Program.  
17  
18  
19  
20

21  
22 **Patient consent:** Not required.  
23  
24

25 **Competing interests:** None relevant to declare.  
26  
27

28 **Ethics approval:** New South Wales Population and Health Services Research Ethics Committee,  
29 approved in August 2016 (2016/08/650)  
30  
31

32 **Data availability:** Unpublished data are not available to be accessed.  
33  
34

35 **Acknowledgements:** The authors wish to thank Professor Jürgen Rehm for his input on the diagnostic  
36 codes chosen and Professor Adrian Dunlop for his input on study design. We wish to thank the Clinical  
37 Terminology Team at the National E-Health Transition Authority (now the Australian Digital Health  
38 Agency) for assisting with mapping ICD-10-AM codes to SCT-AU. We also wish to thank the NSW  
39 Ministry of Health, the Centre for Health Record Linkage (CHeReL), the Cancer Institute NSW and other  
40 data custodians for reviewing the project protocol, approving the project, and providing requested  
41 data. The Cause of Death Unit Record File (COD URF) is provided by the Australian Coordinating  
42 Registry for the COD URF on behalf of the NSW Registry of Births, Deaths and Marriages, NSW Coroner  
43 and the National Coronial Information System.  
44  
45  
46  
47  
48  
49  
50  
51  
52  
53  
54  
55  
56  
57  
58  
59  
60

## References

1. Australian Government Department of Health. National Drug Strategy 2017-2016. In: Health Do, ed. Canberra: Commonwealth of Australia 2017.
2. World Health Organization. Global status report on alcohol and health. Geneva: World Health Organization, 2018.
3. Gao C, Ogeil RP, Lloyd B. Alcohol's burden of disease in Australia. Canberra: Foundation for Alcohol Research and Education and VicHealth in collaboration with Turning Point, 2014.
4. Manning M, Smith C, Mazerolle P. The societal costs of alcohol misuse in Australia. Trends & issues in crime and criminal justice No. 454. Canberra: Australian Institute of Criminology, 2013.
5. Livingston M. Understanding recent trends in Australian alcohol consumption. Canberra: Foundation for Alcohol Research and Education, 2015.
6. Livingston M, Matthews S, Barratt MJ, et al. Diverging trends in alcohol consumption and alcohol-related harm in Victoria. *Australian and New Zealand Journal of Public Health* 2010;34(4):368-73.
7. Livingston M. Recent trends in risky alcohol consumption and related harm among young people in Victoria, Australia. *Australian and New Zealand Journal of Public Health* 2008;32(3):266-71.
8. Callinan S, Pennay A, Livingston M, et al. Patterns in Reduction or Cessation of Drinking in Australia (2001–2013) and Motivation for Change. *Alcohol and Alcoholism* 2018;54(1):79-86. doi: 10.1093/alcalc/agy072
9. Livingston M, Callinan S, Raninen J, et al. Alcohol consumption trends in Australia: Comparing surveys and sales-based measures. *Drug and Alcohol Review* 2018;37:S9-S14.
10. Egerton-Warburton D, Gosbell A, Moore K, et al. Alcohol-related harm in emergency departments: a prospective, multi-centre study. *Addiction* 2018;113(4):623-32. doi: 10.1111/add.14109
11. Lensvelt E, Gilmore W, Liang W, et al. Estimated alcohol-attributable deaths and hospitalisations in Australia 2004 to 2015. National Alcohol Indicators, Bulletin 16. Perth: National Drug Research Institute, Curtin University. , 2018.
12. Degenhardt L, Larney S, Kimber J, et al. The impact of opioid substitution therapy on mortality post-release from prison: retrospective data linkage study. *Addiction* 2014;109(8):1306-17. doi: 10.1111/add.12536
13. Chikritzhs T, Catalano P, Stockwell T, et al. Australian alcohol indicators, 1990-2001: Patterns of alcohol use and related harms for Australian states and territories. Perth: National Drug Research Institute, Curtin University, 2003.
14. Key Concepts of the ChoiceMaker 2 Record Matching System [program]. Washington, DC, 2003.
15. Lawrence G, Dinh I, Taylor L. The Centre for Health Record Linkage: a new resource for health services research and evaluation. *Health Information Management Journal* 2008;37(2):60-62.
16. Hua J, Fitzgerald J. Matching court records to measure reoffending. *BOCSAR NSW Crime and Justice Bulletins* 2006:12.
17. Charlson M, Szatrowski TP, Peterson J, et al. Validation of a combined comorbidity index. *J Clin Epidemiol* 1994;47(11):1245-51. [published Online First: 1994/11/01]
18. Elixhauser A, Steiner C, Harris DR, et al. Comorbidity measures for use with administrative data. *Medical Care* 1998;8-27.
19. AIHW. Australian Institute of Health and Welfare - Hospitals Glossary 2018 [Available from: <https://www.aihw.gov.au/reports-data/health-welfare-services/hospitals/glossary>].
20. Australian Refined Diagnosis Related Groups (AR-DRG) Classification Version 8.0 Australian Consortium for Classification Development.
21. Randall D, Roxburgh A, Gibson A, et al. Mortality among people who use illicit drugs: A toolkit for classifying major causes of death. Sydney: National Drug and Alcohol Research Centre, University of NSW, 2009.



- 1  
2  
3 22. Roerecke M, Rehm J. Cause-specific mortality risk in alcohol use disorder treatment patients: a  
4 systematic review and meta-analysis. *International Journal of Epidemiology* 2014;43(3):906-  
5 19. doi: 10.1093/ije/dyu018  
6  
7 23. Amorim LD, Cai J. Modelling recurrent events: a tutorial for analysis in epidemiology. *Int J*  
8 *Epidemiol* 2015;44(1):324-33. doi: 10.1093/ije/dyu222 [published Online First: 2014/12/17]  
9  
10 24. Pink B. Australian and New Zealand Standard Offence Classification (ANZSOC), 2011 (3rd edition):  
11 Australian Bureau of Statistics,.  
12  
13 25. AIHW. Australian and New Zealand Standard Offence Classification (ANZSOC). Cat. no. 1234.0.,  
14 2011.  
15  
16 26. NSW Ministry of Health. NSW Emergency Department Data Collection: Data Dictionary. Sydney:  
17 NSW Ministry of Health, 2017.  
18  
19 27. McKenzie K, Harrison JE, McClure RJ. Identification of alcohol involvement in injury - related  
20 hospitalisations using routine data compared to medical record review. *Australian and New*  
21 *Zealand Journal of Public Health* 2010;34(2):146-52.  
22  
23 28. Benchimol EI, Smeeth L, Guttman A, et al. The REporting of studies Conducted using  
24 Observational Routinely-collected health Data (RECORD) statement. *PLoS Medicine*  
25 2015;12(10):e1001885. doi: 10.1371/journal.pmed.1001885  
26  
27 29. Stevens GA, Alkema L, Black RE, et al. Guidelines for Accurate and Transparent Health Estimates  
28 Reporting: the GATHER statement. *Lancet* 2016;388(10062):e19-e23. doi: 10.1016/S0140-  
29 6736(16)30388-9  
30  
31  
32  
33  
34  
35  
36  
37  
38  
39  
40  
41  
42  
43  
44  
45  
46  
47  
48  
49  
50  
51  
52  
53  
54  
55  
56  
57  
58  
59  
60



Table 1. Alcohol-related diagnosis codes used from the International Classification of Diseases and Health Related Problems, 10th edition Australian Modification (ICD-10-AM)

| Alcohol-related diagnosis                                   | ICD-10-AM codes                          |
|-------------------------------------------------------------|------------------------------------------|
| Alcohol-induced pseudo-Cushing's syndrome                   | E24.4                                    |
| Wernicke encephalopathy                                     | E51.2                                    |
| Mental and behavioural disorders due to use of alcohol      | F10                                      |
| Degeneration of nervous system due to alcohol               | G31.2                                    |
| Alcoholic polyneuropathy                                    | G62.1                                    |
| Alcoholic myopathy                                          | G72.1                                    |
| Alcoholic cardiomyopathy                                    | I42.6                                    |
| Alcoholic gastritis                                         | K29.2                                    |
| Alcohol-induced liver diseases                              | K70.0, K70.1, K70.2, K70.3, K70.4, K70.9 |
| Alcohol-induced pancreatitis                                | K85.2, K86.0                             |
| Maternal care for (suspected) damage to foetus from alcohol | O35.4                                    |
| Foetal alcohol syndrome (dysmorphic)                        | Q86.0                                    |
| Detection of alcohol in blood                               | R78.0, T51, X45, X65, Y15, Y90, Y91      |

Note. Diagnostic classification systems used by NSW APDC and NSW EDDC in this period comprise the International Classification of Diseases and Health Related Problems 9<sup>th</sup> and 10<sup>th</sup> edition Australian Modification (ICD-9-CM or ICD-10-AM; APDC and EDDC) or the Systematized Nomenclature of Medicine--Clinical Terms Australian Modification (SNOMED-CT-AU; EDDC only). Diagnostic codes used for cohort inclusion were identified through a review of various sources on alcohol-related health burden and mortality and in consultation with specialists in the field (see **Appendix 1** for all the diagnosis codes used for data extraction).

1  
2  
3  
4  
5  
6  
7  
8  
9  
10  
11  
12  
13  
14  
15  
16  
17  
18  
19  
20  
21  
22  
23  
24  
25  
26  
27  
28  
29  
30  
31  
32  
33  
34  
35  
36  
37  
38  
39  
40  
41  
42  
43  
44  
45  
46  
47  
48  
49  
50  
51  
52  
53  
54  
55  
56  
57  
58  
59  
60

Figure 1. Formation of the Data-linkage Cohort Study (DACs)

For peer review only

Table 2. Datasets for Linkage

| Database                                              | Description                                                                                                                                                                                                            | Key variables                                                                                                                                                                                                  |
|-------------------------------------------------------|------------------------------------------------------------------------------------------------------------------------------------------------------------------------------------------------------------------------|----------------------------------------------------------------------------------------------------------------------------------------------------------------------------------------------------------------|
| NSW Admitted Patients Data Collection (NSW APDC)      | Records of all hospital separations (including discharges, transfers and deaths) from all public and private hospitals, public multi-purpose services, and day procedure centres in NSW.                               | Records for each episode of care include date of admission and separation, emergency status, principal and additional diagnoses, treatment procedures, mode of separation and facility identifier.             |
| NSW Emergency Department Data Collection (NSW EDDC)   | Records of all presentations to Emergency Departments in major metropolitan and major non-metropolitan public hospitals in NSW.                                                                                        | Records for each episode of care include date of admission and separation, emergency status, diagnosis, mode of arrival and separation and facility identifier.                                                |
| NSW Mental Health Ambulatory Data Collection (MH-AMB) | Records of episodes of care delivered by NSW ambulatory mental health service units to non-admitted individuals, including day programmes, psychiatric outpatients and outreach services.                              | Records for each contact include date of contact, diagnosis and services delivered. Facility information includes provider group, provider role and service category and facility location.                    |
| NSW Central Cancer Registry                           | Records of all new cases of cancer (defined as an occurrence of a primary malignant neoplasm in an organ of a particular person; excluding occurrence of skin cancers other than melanoma) diagnosed in NSW residents. | Data includes clinical details of individuals e.g. cancer group, degree of spread, date and age of diagnosis. If applicable, information regarding date and age of death, and cause of death is also included. |

|                                                                                                                                                     |                                                                                                                                                                                                                                                                                                                  |                                                                                                                                                                                                                   |
|-----------------------------------------------------------------------------------------------------------------------------------------------------|------------------------------------------------------------------------------------------------------------------------------------------------------------------------------------------------------------------------------------------------------------------------------------------------------------------|-------------------------------------------------------------------------------------------------------------------------------------------------------------------------------------------------------------------|
| <p>NSW Re-offending Database (ROD)</p>                                                                                                              | <p>Court records, with all finalised court appearances in NSW Children’s, Local, District and Supreme Courts, and juvenile detention and adult incarceration in NSW.</p>                                                                                                                                         | <p>Records include date and type of offence, outcome of court appearance, conviction date and penalty. Incarceration information includes commencement and conclusion date of incarceration, conviction date.</p> |
| <p>NSW Registry of Births, Deaths and Marriages (RBDM) and the Australian Coordinating Registry (ACR) Cause of Death Unit Record File (COD URF)</p> | <p>The two datasets contain mortality information for deaths occurring in NSW, which also includes Australian Bureau of Statistics (ABS) death registration data. The Cause of Death Unit Record File is held by the NSW Ministry of Health Secure Analytics for Population Health Research and Intelligence</p> | <p>Data includes date of death and contributing or multiple cause of death codes (where relevant).</p>                                                                                                            |

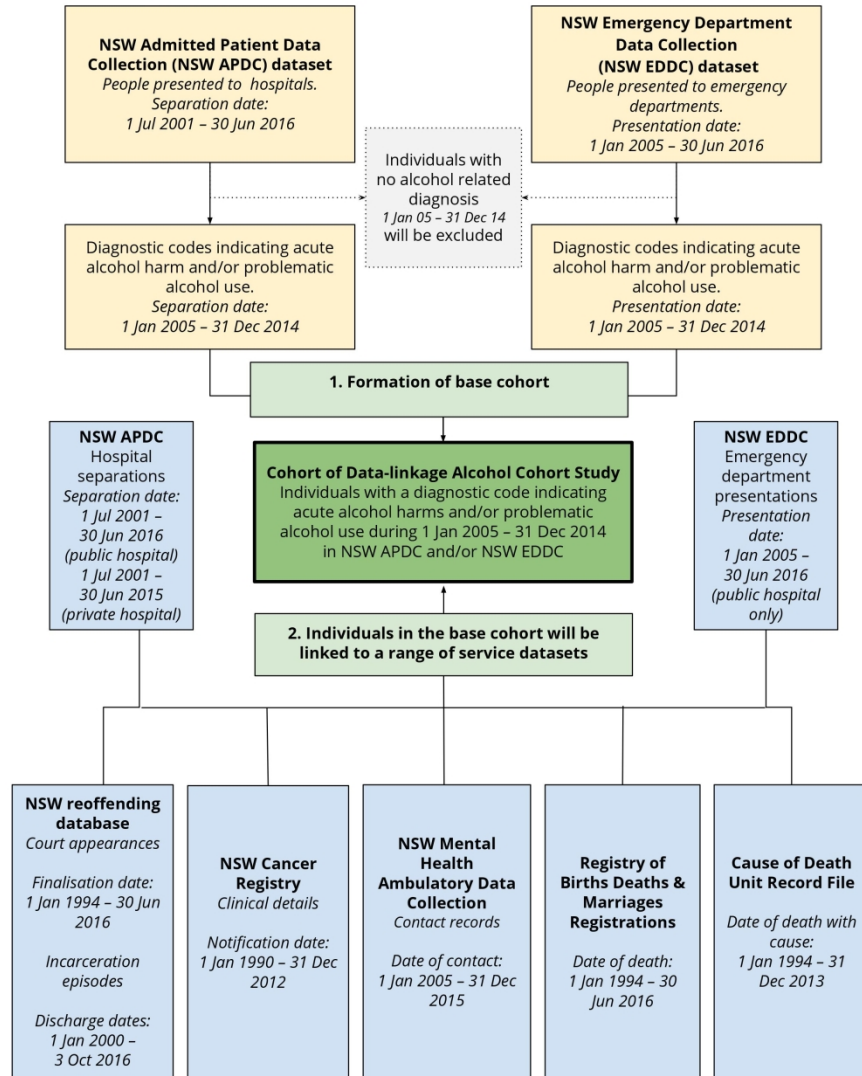

209x289mm (300 x 300 DPI)

## Appendix 1: Diagnostic codes used for data extraction

### A) ICD codes

The codes on the following sheet will be used to identify people in the Admitted Patients Data Collection and Emergency Department Data Collection (cases). Codes were selected based on identification by NSW Health as reflective of an acute alcohol problem<sup>1</sup> or, where indicated (\*) from Turning Point Alcohol and Drug Centre guidance for calculating alcohol and other drug statistics<sup>2</sup>. Where indicated (~), additional codes are included on the basis of discussion between investigators and specialists in the field. ICD-9-CM and ICD-10-AM codes were mapped using the Australian Consortium for Classification Development mapping tables, with backwards mapping from ICD-10-AM to ICD-9-CM<sup>3</sup>, and alcohol-specific code mapping developed by Chikritzhs et al.<sup>4</sup>.

| ICD-10-AM | Conditions                                                 | ICD-9-CM                                  | Conditions                                                     |
|-----------|------------------------------------------------------------|-------------------------------------------|----------------------------------------------------------------|
| E24.4     | *Alcohol-induced pseudo-Cushing's syndrome                 | <i>No alcohol-specific code available</i> |                                                                |
| E51.2     | ~Wernicke encephalopathy                                   | 291.1                                     | Alcohol-induced persisting amnesic disorder                    |
| F10       | Mental and behavioural disorders due to use of alcohol     | 291                                       | Alcohol-induced mental disorders                               |
|           |                                                            | 303                                       | Alcohol dependence syndrome                                    |
|           |                                                            | 305.0                                     | Nondependent alcohol abuse                                     |
| G31.2     | *Degeneration of nervous system due to alcohol             | 303                                       | Alcohol dependence syndrome                                    |
| G62.1     | *Alcoholic polyneuropathy                                  | 357.5                                     | *Alcoholic polyneuropathy                                      |
| G72.1     | *Alcoholic myopathy                                        | <i>No alcohol-specific code available</i> |                                                                |
| I42.6     | *Alcoholic cardiomyopathy                                  | 425.5                                     | *Alcoholic cardiomyopathy                                      |
| K29.2     | *Alcoholic gastritis                                       | 535.3                                     | *Alcoholic gastritis                                           |
| K70.0     | Alcoholic fatty liver                                      | 571.0                                     | *Alcoholic fatty liver                                         |
| K70.1     | Alcoholic hepatitis                                        | 571.1                                     | Acute alcoholic hepatitis                                      |
| K70.2     | Alcoholic fibrosis and sclerosis of liver                  |                                           |                                                                |
| K70.3     | Alcoholic cirrhosis of liver                               | 571.2                                     | Alcoholic cirrhosis of liver                                   |
| K70.4     | Alcoholic hepatic failure                                  |                                           |                                                                |
| K70.9     | Alcoholic liver disease, unspecified                       | 571.3                                     | Alcoholic liver damage, unspecified                            |
| K85.2     | *Alcohol-induced acute pancreatitis                        | <i>No alcohol-specific code available</i> |                                                                |
| K86.0     | *Alcohol-induced chronic pancreatitis                      | <i>No alcohol-specific code available</i> |                                                                |
| O35.4     | *Maternal care for suspected damage to foetus from alcohol | <i>No alcohol-specific code available</i> |                                                                |
| P04.3     | *Foetus and newborn affected by maternal use of alcohol    | 760.71                                    | Alcohol affecting fetus or newborn via placenta or breast milk |

|                    |                                                                     |                                           |                                                          |
|--------------------|---------------------------------------------------------------------|-------------------------------------------|----------------------------------------------------------|
| Q86.0              | *Foetal alcohol syndrome (dysmorphic)                               |                                           |                                                          |
| R78.0              | Finding of alcohol in blood                                         | 790.3                                     | Excessive blood level of alcohol                         |
| T51                | Toxic effect of alcohol                                             | 980                                       | Toxic effect of alcohol                                  |
| X45                | Accidental poisoning by and exposure to alcohol                     | E860                                      | Accidental poisoning by alcohol not elsewhere classified |
| X65 <sup>^</sup>   | Intentional self-poisoning by and exposure to alcohol               | <i>No alcohol-specific code available</i> |                                                          |
| Y15                | Poisoning by and exposure to alcohol, undetermined intent           | E860                                      | Accidental poisoning by alcohol not elsewhere classified |
|                    |                                                                     | 980                                       | Toxic effect of alcohol                                  |
| Y90 <sup>^^</sup>  | Evidence of alcohol involvement determined by blood alcohol level   | <i>No alcohol-specific code available</i> |                                                          |
| Y91 <sup>^^^</sup> | Evidence of alcohol involvement determined by level of intoxication | <i>No alcohol-specific code available</i> |                                                          |

<sup>^</sup>note that no generalised mapping matches were available with SNO-MED although lexical matching suggest use of the above codes

<sup>^^</sup>note that no generalised mapping matches were available with SNO-MED although lexical matching suggest use of the 'Finding of alcohol in blood' code

<sup>^^^</sup>note that generalised mapping matches were only available for Y91.1 and Y91.9 with SNO-MED although lexical matching suggest use of 'Alcohol intoxication' code<sup>∞</sup>

## B) SNOMED codes

The following codes will be used to identify people in the Emergency Department Data Collection (cases). Emergency departments may use either or a combination of ICD-9, ICD-10 (see above) or SNOMED. Codes were mapped in consultation with the Clinical Terminology Team at the National E-Health Transition Authority (now Australian Digital Health Agency) to approximate ICD-10-AM codes using lexical and generalised mapping (the latter comprising the International SCT-ICD map) for SCT-AU (v20160430 April 2016). A number of codes were only found in ICD-10 and not ICD-10-CM (F10 K29.20 K29.21 T51 X45 X65 Y90 Y91), and thus these codes were searched with a wildcard for the last character, yielding hits for the following codes (F10.0 F10.1 F10.2 F10.3 F10.4 F10.5 F10.6 F10.7 F10.8 F10.9 K29.2 T51.0 T51.1 T51.2 T51.3 T51.9 X45 X45.99 Y91.1 Y91.9). Lexical mapping (i.e., synonym with a lexical match) was used for those codes where a hit was not identified with the International SCT-ICD map. Note that those variables flagged with a # were added following review of NSW Health codes for acute emergency department presentation data; the same applies where flagged with a ^, with the exception that these terms are now deprecated.

| ICD-10-AM | ICD-9-CM                                  | SNOMED-CT-AU    | CONDITIONS                                  |
|-----------|-------------------------------------------|-----------------|---------------------------------------------|
| E24.4     | <i>No alcohol-specific code available</i> | 237738005       | Pseudo-Cushing's syndrome due to alcohol    |
| E51.2     | 291.1                                     | 21007002        | Wernicke's disease                          |
| F10       | 291                                       | 191477001       | Pathological alcohol intoxication           |
|           | 303                                       | 42344001        | Alcohol-induced psychosis                   |
|           | 305.0                                     | 25702006        | Alcohol intoxication                        |
|           |                                           | 228315001       | Binge drinker                               |
|           |                                           | 18653004        | Alcohol intoxication delirium               |
|           |                                           | 21000000        | Idiosyncratic intoxication                  |
|           |                                           | 228341007       | Unable to abstain from drinking             |
|           |                                           | 32553006        | Hangover                                    |
|           |                                           | 228357007       | Persistent effect of alcohol                |
|           |                                           | 228316000       | Alcoholic binges exceeding sensible amounts |
|           |                                           | 268645007       | Nondependent alcohol abuse                  |
|           |                                           | 228354000       | Drink driving                               |
|           |                                           | 228317009       | Alcoholic binges exceeding safe amounts     |
|           |                                           | 191883007       | Nondependent alcohol abuse, episodic        |
|           |                                           | 169942003       | Maternal alcohol abuse                      |
|           |                                           | 304605000       | Methanol abuse                              |
|           |                                           | 288021000119107 | Disorder due to alcohol abuse               |
|           |                                           | 191882002       | Nondependent alcohol abuse, continuous      |
|           |                                           | 15167005        | Alcohol abuse                               |
|           |                                           | 284591009       | Persistent alcohol abuse                    |



|    |  |                   |                                                        |
|----|--|-------------------|--------------------------------------------------------|
| 1  |  |                   |                                                        |
| 2  |  |                   |                                                        |
| 3  |  | 228310006         | Drinks in morning to get rid of hangover               |
| 4  |  |                   |                                                        |
| 5  |  | 41083005          | Alcohol-induced sleep disorder                         |
| 6  |  |                   |                                                        |
| 7  |  | 191884001         | Nondependent alcohol abuse in remission                |
| 8  |  |                   |                                                        |
| 9  |  | 86325007          | Non megaloblastic anaemia due to alcoholism            |
| 10 |  |                   |                                                        |
| 11 |  | 191805002         | Episodic acute alcoholic intoxication in alcoholism    |
| 12 |  |                   |                                                        |
| 13 |  | 191802004         | Acute alcoholic intoxication in alcoholism             |
| 14 |  |                   |                                                        |
| 15 |  | 7200002           | Alcoholism                                             |
| 16 |  |                   |                                                        |
| 17 |  | 235955000         | Drug-induced chronic pancreatitis                      |
| 18 |  |                   |                                                        |
| 19 |  | 66590003          | Alcohol dependence                                     |
| 20 |  |                   |                                                        |
| 21 |  | 713583005         | Mild alcohol dependence                                |
| 22 |  |                   |                                                        |
| 23 |  | 2403008           | Psychoactive substance dependence                      |
| 24 |  |                   |                                                        |
| 25 |  | 25702006          | Alcohol intoxication                                   |
| 26 |  |                   |                                                        |
| 27 |  | 7200002           | Alcoholism                                             |
| 28 |  |                   |                                                        |
| 29 |  | 308742005         | Alcohol withdrawal-induced convulsion                  |
| 30 |  |                   |                                                        |
| 31 |  | 713862009         | Severe alcohol dependence                              |
| 32 |  |                   |                                                        |
| 33 |  | 10755041000119100 | Alcohol dependence in childbirth                       |
| 34 |  |                   |                                                        |
| 35 |  | 191812006         | Episodic chronic alcoholism                            |
| 36 |  |                   |                                                        |
| 37 |  | 2403008           | Psychoactive substance dependence                      |
| 38 |  |                   |                                                        |
| 39 |  | 154211000119108   | Chronic pancreatitis due to chronic alcoholism         |
| 40 |  |                   |                                                        |
| 41 |  | 191804003         | Continuous acute alcoholic intoxication in alcoholism  |
| 42 |  |                   |                                                        |
| 43 |  | 191813001         | Chronic alcoholism in remission                        |
| 44 |  |                   |                                                        |
| 45 |  | 7200002           | Alcoholism                                             |
| 46 |  |                   |                                                        |
| 47 |  | 87810006          | Megaloblastic anaemia due to alcoholism                |
| 48 |  |                   |                                                        |
| 49 |  | 66590003          | Alcohol dependence                                     |
| 50 |  |                   |                                                        |
| 51 |  | 231467000         | Absinthe addiction                                     |
| 52 |  |                   |                                                        |
| 53 |  | 300939009         | Abstinent alcoholic                                    |
| 54 |  |                   |                                                        |
| 55 |  | 191811004         | Continuous chronic alcoholism                          |
| 56 |  |                   |                                                        |
| 57 |  | 714829008         | Moderate alcohol dependence                            |
| 58 |  |                   |                                                        |
| 59 |  | 235952002         | Chronic pancreatitis due to acute alcohol intoxication |
| 60 |  |                   |                                                        |
|    |  | 97571000119109    | Thrombocytopenia co-occurrent and due to alcoholism    |
|    |  |                   |                                                        |
|    |  | 66590003          | Alcohol dependence                                     |
|    |  |                   |                                                        |
|    |  | 10741871000119101 | Alcohol dependence in pregnancy                        |
|    |  |                   |                                                        |
|    |  | 288041000119101   | Perceptual disturbance due to alcohol withdrawal       |

|    |  |           |                                                                                                                                                  |
|----|--|-----------|--------------------------------------------------------------------------------------------------------------------------------------------------|
| 1  |  |           |                                                                                                                                                  |
| 2  |  |           |                                                                                                                                                  |
| 3  |  | 191480000 | Alcohol withdrawal syndrome                                                                                                                      |
| 4  |  | 85561006  | Uncomplicated alcohol withdrawal                                                                                                                 |
| 5  |  | 191480000 | Alcohol withdrawal syndrome                                                                                                                      |
| 6  |  | 8635005   | Alcohol withdrawal delirium                                                                                                                      |
| 7  |  | 79578000  | Alcohol paranoia                                                                                                                                 |
| 8  |  | 61144001  | Alcohol-induced psychotic disorder with delusions                                                                                                |
| 9  |  | 191476005 | Alcohol withdrawal hallucinosis                                                                                                                  |
| 10 |  | 7052005   | Alcohol hallucinosis                                                                                                                             |
| 11 |  | 42344001  | Alcohol-induced psychosis                                                                                                                        |
| 12 |  | 191480000 | Alcohol withdrawal syndrome                                                                                                                      |
| 13 |  | 191478006 | Alcoholic paranoia                                                                                                                               |
| 14 |  | 191471000 | Korsakov's alcoholic psychosis with peripheral neuritis                                                                                          |
| 15 |  | 73097000  | Alcohol amnestic disorder                                                                                                                        |
| 16 |  | 192811002 | Alcoholic encephalopathy                                                                                                                         |
| 17 |  | 69482004  | Korsakoff's psychosis                                                                                                                            |
| 18 |  | 42344001  | Alcohol-induced psychosis                                                                                                                        |
| 19 |  | 281004    | Dementia associated with alcoholism                                                                                                              |
| 20 |  | 231463001 | ^Alcoholic dementia NOS (disorder)                                                                                                               |
| 21 |  | 191475009 | Chronic alcoholic brain syndrome                                                                                                                 |
| 22 |  | 78524005  | Alcohol-induced sexual dysfunction                                                                                                               |
| 23 |  | 34938008  | Alcohol-induced anxiety disorder                                                                                                                 |
| 24 |  | 228353006 | Reverse tolerance to alcohol                                                                                                                     |
| 25 |  | 228351008 | Physical tolerance to alcohol                                                                                                                    |
| 26 |  | 228350009 | Behavioural tolerance to alcohol                                                                                                                 |
| 27 |  | 53936005  | Alcohol-induced mood disorder                                                                                                                    |
| 28 |  | 228323004 | Drinking bout                                                                                                                                    |
| 29 |  | 29212009  | Alcohol-induced organic mental disorder                                                                                                          |
| 30 |  | 228322009 | Drinking episode                                                                                                                                 |
| 31 |  | 192206005 | ^Mental and behavioral disorders due to use of alcohol (disorder)                                                                                |
| 32 |  | 192207001 | ^Mental and behavioral disorders due to use of alcohol: acute intoxication (disorder)                                                            |
| 33 |  | 192208006 | ^Mental and behavioral disorders due to use of alcohol: harmful use (disorder)                                                                   |
| 34 |  | 192209003 | ^Mental and behavioural disorders due to use of alcohol: dependence syndrome) or (chronic alcoholism [& (addiction) or (dipsomania)]) (disorder) |
| 35 |  |           |                                                                                                                                                  |
| 36 |  |           |                                                                                                                                                  |
| 37 |  |           |                                                                                                                                                  |
| 38 |  |           |                                                                                                                                                  |
| 39 |  |           |                                                                                                                                                  |
| 40 |  |           |                                                                                                                                                  |
| 41 |  |           |                                                                                                                                                  |
| 42 |  |           |                                                                                                                                                  |
| 43 |  |           |                                                                                                                                                  |
| 44 |  |           |                                                                                                                                                  |
| 45 |  |           |                                                                                                                                                  |
| 46 |  |           |                                                                                                                                                  |
| 47 |  |           |                                                                                                                                                  |
| 48 |  |           |                                                                                                                                                  |
| 49 |  |           |                                                                                                                                                  |
| 50 |  |           |                                                                                                                                                  |
| 51 |  |           |                                                                                                                                                  |
| 52 |  |           |                                                                                                                                                  |
| 53 |  |           |                                                                                                                                                  |
| 54 |  |           |                                                                                                                                                  |
| 55 |  |           |                                                                                                                                                  |
| 56 |  |           |                                                                                                                                                  |
| 57 |  |           |                                                                                                                                                  |
| 58 |  |           |                                                                                                                                                  |
| 59 |  |           |                                                                                                                                                  |
| 60 |  |           |                                                                                                                                                  |

|       |       |                 |                                                                                                                                                             |
|-------|-------|-----------------|-------------------------------------------------------------------------------------------------------------------------------------------------------------|
|       |       | 192210008       | ^Mental and behavioral disorders due to use of alcohol: withdrawal state (disorder)                                                                         |
|       |       | 192211007       | ^Mental and behavioral disorders due to use of alcohol: withdrawal state with delirium (disorder)                                                           |
|       |       | 192212000       | ^Mental and behavioural disorders due to use of alcohol: psychotic disorder (& [hallucinosi] or [jealousy] or [paranoia] or [psychosis NOS])                |
|       |       | 192213005       | ^Mental and behavioral disorders due to use of alcohol: amnesic syndrome (disorder)                                                                         |
|       |       | 192214004       | ^Mental and behavioural disorders due to use of alcohol: residual and late-onset psychotic disorder) or (chronic alcoholic brain syndrome [& dementia NOS]) |
|       |       | 192215003       | ^Mental and behavioral disorders due to use of alcohol: other mental and behavioral disorders (disorder)                                                    |
|       |       | 268639004       | ^Chronic alcoholism (disorder)                                                                                                                              |
|       |       | 268683008       | ^Mental and behavioral disorders due to use of alcohol: dependence syndrome (disorder)                                                                      |
|       |       | 268684002       | ^Mental and behavioral disorders due to use of alcohol: psychotic disorder (disorder)                                                                       |
|       |       | 304606004       | ^Ethanol abuse (finding)                                                                                                                                    |
|       |       | 268685001       | ^Mental and behavioral disorders due to use of alcohol: residual and late-onset psychotic disorder (disorder)                                               |
|       |       | 192216002       | ^Mental and behavioral disorders due to use of alcohol: unspecified mental and behavioral disorder (disorder)                                               |
| G31.2 | 303   | 192811002       | Alcoholic encephalopathy                                                                                                                                    |
|       |       | 133301000119102 | Degenerative brain disorder due to alcohol                                                                                                                  |
|       |       | 300992002       | Alcohol-induced cerebellar ataxia                                                                                                                           |
|       |       | 361272001       | Cerebellar ataxia due to alcoholism                                                                                                                         |
|       |       | 135761000119101 | Cerebral degeneration due to alcoholism                                                                                                                     |
|       |       | 230353003       | Morel laminar sclerosis                                                                                                                                     |
|       |       | 361273006       | Alcoholic cerebellar degeneration                                                                                                                           |
| G62.1 | 357.5 | 192811002       | Alcoholic encephalopathy                                                                                                                                    |

|       |                                           |                  |                                                            |
|-------|-------------------------------------------|------------------|------------------------------------------------------------|
|       |                                           | 69482004         | Korsakoff's psychosis                                      |
|       |                                           | 191471000        | Korsakov's alcoholic psychosis with peripheral neuritis    |
|       |                                           | 7916009          | Alcoholic polyneuropathy                                   |
|       |                                           | 191472007        | #Wernicke-Korsakov syndrome (disorder)                     |
| G72.1 | <i>No alcohol-specific code available</i> | 19303008         | Alcohol myopathy                                           |
| I42.6 | 425.5                                     | 83521008         | Dilated cardiomyopathy caused by alcohol                   |
| K29.2 | 535.3                                     | 2043009          | Alcoholic gastritis                                        |
|       |                                           | 40241000119109   | Gastric haemorrhage due to alcoholic gastritis             |
| K70.0 | 571.0                                     | 41309000         | Alcoholic liver damage                                     |
| K70.1 | 571.1                                     | 50325005         | Alcoholic fatty liver                                      |
| K70.2 | 571.2                                     | 235875008        | Alcoholic hepatitis                                        |
| K70.3 | 571.3                                     | 9953008          | Acute alcoholic liver disease                              |
| K70.4 |                                           | 1085021000119106 | Hepatic ascites due to chronic alcoholic hepatitis         |
| K70.9 |                                           | 1082611000119101 | Ascites due to alcoholic hepatitis                         |
|       |                                           | 41309000         | Alcoholic liver damage                                     |
|       |                                           | 307757001        | Chronic alcoholic hepatitis                                |
|       |                                           | 235880004        | Alcoholic fibrosis and sclerosis of liver                  |
|       |                                           | 420054005        | Alcoholic cirrhosis                                        |
|       |                                           | 309783001        | Oesophageal varices in alcoholic cirrhosis of the liver    |
|       |                                           | 1082601000119104 | Ascites due to alcoholic cirrhosis                         |
|       |                                           | 235881000        | Alcoholic hepatic failure                                  |
|       |                                           | 1082621000119108 | Hepatic coma due to alcoholic liver failure                |
|       |                                           | 713370005        | Acute on chronic alcoholic liver disease                   |
|       |                                           | 713181003        | Chronic alcoholic liver disease                            |
| K85.2 | <i>No alcohol-specific code available</i> | 235942001        | Alcohol-induced acute pancreatitis                         |
|       |                                           | 445507008        | Alcohol-induced pancreatitis                               |
| K86.0 | <i>No alcohol-specific code available</i> | 235952002        | Chronic pancreatitis due to acute alcohol intoxication     |
|       |                                           | 154211000119108  | Chronic pancreatitis due to chronic alcoholism             |
| O35.4 | <i>No alcohol-specific code available</i> | 199551008        | Maternal care for (suspected) damage to fetus from alcohol |

|       |                                                                |           |                                                                                 |
|-------|----------------------------------------------------------------|-----------|---------------------------------------------------------------------------------|
| P04.3 | 760.71                                                         | 36558000  | Fetal or neonatal effect of alcohol transmitted via placenta and/or breast milk |
|       |                                                                | 268796000 | Fetal or neonatal effect of placental or breast transfer of alcohol             |
|       |                                                                | 698321001 | Neonatal effect of alcohol transmitted via breast milk                          |
|       |                                                                | 205791004 | Fetal or neonatal effect of maternal use of alcohol                             |
|       |                                                                | 609438005 | Fetal or neonatal effect of maternal alcohol addiction                          |
| Q86.0 | Alcohol affecting fetus or newborn via placenta or breast milk | 609437000 | Fetal Alcohol Spectrum Disorder                                                 |
|       |                                                                | 205788004 | Fetal alcohol syndrome                                                          |
|       |                                                                | 205791004 | Fetal or neonatal effect of maternal use of alcohol                             |
|       |                                                                | 36558000  | Fetal or neonatal effect of alcohol transmitted via placenta and/or breast milk |
| R78.0 | 790.3                                                          | 442766007 | Alcohol in blood specimen above reference range                                 |
|       |                                                                | 442669008 | Ethanol in blood specimen above legal threshold for operating vehicle           |
|       |                                                                | 441685000 | Ethanol in blood specimen above reference range                                 |
|       |                                                                | 274776000 | Finding of alcohol in blood                                                     |
|       |                                                                | 207273009 | ^Alcohol blood level excessive (situation)                                      |
|       |                                                                | 160592001 | Alcohol intake above recommended sensible limits                                |
| T51   | 980                                                            | 216633005 | Accidental poisoning by alcoholic beverage                                      |
|       |                                                                | 216635003 | Accidental poisoning by denatured alcohol                                       |
|       |                                                                | 95906008  | Drug interaction with alcohol                                                   |
|       |                                                                | 287166006 | Accidental poisoning with ethyl alcohol                                         |
|       |                                                                | 442764005 | Poisoning by benzene                                                            |
|       |                                                                | 82782008  | Alcohol poisoning                                                               |
|       |                                                                | 212807002 | Grain alcohol causing toxic effect                                              |
|       |                                                                | 216636002 | Accidental poisoning by methylated spirit                                       |
|       |                                                                | 315226008 | Pain in lymph nodes after alcohol consumption                                   |
|       |                                                                | 89507002  | Toxic effect of denatured alcohol                                               |
|       |                                                                | 25966003  | Metabolic acidosis due to methanol                                              |
|       |                                                                | 212809004 | Methyl alcohol causing toxic effect                                             |

|     |      |           |                                                        |
|-----|------|-----------|--------------------------------------------------------|
|     |      | 216640006 | Accidental poisoning by methanol                       |
|     |      | 212813006 | Toxic effect of isopropyl alcohol                      |
|     |      | 6749002   | Toxic effect of propyl alcohol                         |
|     |      | 216645001 | Accidental poisoning by isopropyl alcohol              |
|     |      | 216648004 | Accidental poisoning by rubbing alcohol substitute     |
|     |      | 4953006   | Toxic effect of butyl alcohol                          |
|     |      | 6749002   | Toxic effect of propyl alcohol                         |
|     |      | 57346004  | Toxic effect of fusel oil                              |
|     |      | 216651006 | Accidental poisoning by fusel oil                      |
|     |      | 87460008  | Toxic effect of amyl alcohol                           |
|     |      | 67426006  | Toxic effect of alcohol                                |
|     |      | 82047000  | Diarrhoea due to alcohol intake                        |
|     |      | 314539001 | Alcohol related optic neuropathy                       |
|     |      | 269765000 | Accidental poisoning by alcohol                        |
|     |      | 212816003 | ^Rubbing alcohol causing toxic effect (disorder)       |
|     |      | 212817007 | ^Isopropyl alcohol causing toxic effect NOS (disorder) |
|     |      | 212818002 | ^Fusel oil causing toxic effect NOS (disorder)         |
|     |      | 212819005 | ^Other alcohol causing toxic effect (disorder)         |
|     |      | 212820004 | ^Alcohol causing toxic effect NOS (disorder)           |
|     |      | 213687005 | ^Toxic effect of other alcohols (disorder)             |
|     |      | 212815004 | ^Isopropanol causing toxic effect (disorder)           |
|     |      | 212814000 | ^Dimethyl carbinol causing toxic effect (disorder)     |
|     |      | 212811008 | ^Wood alcohol causing toxic effect (disorder)          |
|     |      | 212808007 | ^Ethyl alcohol causing toxic effect NOS (disorder)     |
|     |      | 212806006 | ^Ethyl alcohol causing toxic effect (disorder)         |
|     |      | 699208000 | Thrombocytopenia due to alcohol                        |
| X45 | E860 | 212813006 | Toxic effect of isopropyl alcohol                      |
|     |      | 216640006 | Accidental poisoning by methanol                       |
|     |      | 82782008  | Alcohol poisoning                                      |
|     |      | 216635003 | Accidental poisoning by denatured alcohol              |
|     |      | 6749002   | Toxic effect of propyl alcohol                         |
|     |      | 212809004 | Methyl alcohol causing toxic effect                    |
|     |      | 242263000 | Accidental exposure to alcohol                         |

|    |  |           |                                                                                                                                  |
|----|--|-----------|----------------------------------------------------------------------------------------------------------------------------------|
| 1  |  |           |                                                                                                                                  |
| 2  |  |           |                                                                                                                                  |
| 3  |  | 216633005 | Accidental poisoning by alcoholic beverage                                                                                       |
| 4  |  |           |                                                                                                                                  |
| 5  |  | 212813006 | Toxic effect of isopropyl alcohol                                                                                                |
| 6  |  |           |                                                                                                                                  |
| 7  |  | 242265007 | Accidental exposure to ethanol                                                                                                   |
| 8  |  |           |                                                                                                                                  |
| 9  |  | 278363000 | Alcoholic macrocytosis                                                                                                           |
| 10 |  |           |                                                                                                                                  |
| 11 |  | 442764005 | Poisoning by benzene                                                                                                             |
| 12 |  |           |                                                                                                                                  |
| 13 |  | 4953006   | Toxic effect of butyl alcohol                                                                                                    |
| 14 |  |           |                                                                                                                                  |
| 15 |  | 287166006 | Accidental poisoning with ethyl alcohol                                                                                          |
| 16 |  |           |                                                                                                                                  |
| 17 |  | 699208000 | Thrombocytopenia due to alcohol                                                                                                  |
| 18 |  |           |                                                                                                                                  |
| 19 |  | 212809004 | Methyl alcohol causing toxic effect                                                                                              |
| 20 |  |           |                                                                                                                                  |
| 21 |  | 67426006  | Toxic effect of alcohol                                                                                                          |
| 22 |  |           |                                                                                                                                  |
| 23 |  | 6749002   | Toxic effect of propyl alcohol                                                                                                   |
| 24 |  |           |                                                                                                                                  |
| 25 |  | 216645001 | Accidental poisoning by isopropyl alcohol                                                                                        |
| 26 |  |           |                                                                                                                                  |
| 27 |  | 89507002  | Toxic effect of denatured alcohol                                                                                                |
| 28 |  |           |                                                                                                                                  |
| 29 |  | 212807002 | Grain alcohol causing toxic effect                                                                                               |
| 30 |  |           |                                                                                                                                  |
| 31 |  | 216648004 | Accidental poisoning by rubbing alcohol substitute                                                                               |
| 32 |  |           |                                                                                                                                  |
| 33 |  | 216651006 | Accidental poisoning by fusel oil                                                                                                |
| 34 |  |           |                                                                                                                                  |
| 35 |  | 216636002 | Accidental poisoning by methylated spirit                                                                                        |
| 36 |  |           |                                                                                                                                  |
| 37 |  | 89507002  | Toxic effect of denatured alcohol                                                                                                |
| 38 |  |           |                                                                                                                                  |
| 39 |  | 442764005 | Poisoning by benzene                                                                                                             |
| 40 |  |           |                                                                                                                                  |
| 41 |  | 87460008  | Toxic effect of amyl alcohol                                                                                                     |
| 42 |  |           |                                                                                                                                  |
| 43 |  | 269765000 | Accidental poisoning by alcohol                                                                                                  |
| 44 |  |           |                                                                                                                                  |
| 45 |  | 57346004  | Toxic effect of fusel oil                                                                                                        |
| 46 |  |           |                                                                                                                                  |
| 47 |  | 221843007 | ^Accidental poisoning by and exposure to alcohol, occurrence at home (event)                                                     |
| 48 |  |           |                                                                                                                                  |
| 49 |  | 221844001 | ^Accidental poisoning by and exposure to alcohol, occurrence in residential institution (event)                                  |
| 50 |  |           |                                                                                                                                  |
| 51 |  | 221845000 | ^Accidental poisoning by and exposure to alcohol, occurrence at school, other institution and public administrative area (event) |
| 52 |  |           |                                                                                                                                  |
| 53 |  | 221846004 | ^Accidental poisoning by and exposure to alcohol, occurrence at sports and athletics area (event)                                |
| 54 |  |           |                                                                                                                                  |
| 55 |  | 221847008 | ^Accidental poisoning by and exposure to alcohol, occurrence on street and highway (event)                                       |
| 56 |  |           |                                                                                                                                  |
| 57 |  | 221848003 | ^Accidental poisoning by and exposure to alcohol, occurrence at trade and service area (event)                                   |
| 58 |  |           |                                                                                                                                  |
| 59 |  |           |                                                                                                                                  |
| 60 |  |           |                                                                                                                                  |

|                                                                                                                                     |                                    |           |                                                                                                                                        |
|-------------------------------------------------------------------------------------------------------------------------------------|------------------------------------|-----------|----------------------------------------------------------------------------------------------------------------------------------------|
|                                                                                                                                     |                                    | 221849006 | ^Accidental poisoning by and exposure to alcohol, occurrence at industrial and construction area (event)                               |
|                                                                                                                                     |                                    | 221850006 | ^Accidental poisoning by and exposure to alcohol, occurrence on farm (event)                                                           |
|                                                                                                                                     |                                    | 221851005 | ^Accidental poisoning by and exposure to alcohol, occurrence at other specified place (event)                                          |
|                                                                                                                                     |                                    | 221852003 | ^Accidental poisoning by and exposure to alcohol, occurrence at unspecified place (event)                                              |
|                                                                                                                                     |                                    | 57346004  | Toxic effect of fusel oil                                                                                                              |
| X65 (note that no generalised mapping matches were available with SNO-MED although lexical matching suggest use of the above codes) | No alcohol-specific code available | 222103001 | ^Intentional self-poisoning by and exposure to alcohol (event)                                                                         |
|                                                                                                                                     |                                    | 222104007 | ^Intentional self-poisoning by and exposure to alcohol, occurrence at home (event)                                                     |
|                                                                                                                                     |                                    | 222105008 | ^Intentional self-poisoning by and exposure to alcohol, occurrence in residential institution (event)                                  |
|                                                                                                                                     |                                    | 222106009 | ^Intentional self-poisoning by and exposure to alcohol, occurrence at school, other institution and public administrative area (event) |
|                                                                                                                                     |                                    | 222107000 | ^Intentional self-poisoning by and exposure to alcohol, occurrence at sports and athletics area (event)                                |
|                                                                                                                                     |                                    | 222108005 | ^Intentional self-poisoning by and exposure to alcohol, occurrence on street and highway (event)                                       |
|                                                                                                                                     |                                    | 222110007 | ^Intentional self-poisoning by and exposure to alcohol, occurrence at trade and service area (event)                                   |
|                                                                                                                                     |                                    | 222111006 | ^Intentional self-poisoning by and exposure to alcohol, occurrence at industrial and construction area (event)                         |



|     |      |           |                                                                                                                                            |
|-----|------|-----------|--------------------------------------------------------------------------------------------------------------------------------------------|
|     |      | 222112004 | ^Intentional self-poisoning by and exposure to alcohol, occurrence on farm (event)                                                         |
|     |      | 222113009 | ^Intentional self-poisoning by and exposure to alcohol, occurrence at other specified place (event)                                        |
|     |      | 222114003 | ^Intentional self-poisoning by and exposure to alcohol, occurrence at unspecified place (event)                                            |
|     |      | 312963001 | Methanol retinopathy                                                                                                                       |
| Y15 | E860 | 222702003 | ^Poisoning by and exposure to alcohol, undetermined intent (event)                                                                         |
|     | 980  | 222703008 | ^Poisoning by and exposure to alcohol, occurrence at home, undetermined intent (event)                                                     |
|     |      | 222704002 | ^Poisoning by and exposure to alcohol, occurrence in residential institution, undetermined intent (event)                                  |
|     |      | 222705001 | ^Poisoning by and exposure to alcohol, occurrence at school, other institution and public administrative area, undetermined intent (event) |
|     |      | 222706000 | ^Poisoning by and exposure to alcohol, occurrence at sports and athletics area, undetermined intent (event)                                |
|     |      | 222707009 | ^Poisoning by and exposure to alcohol, occurrence on street and highway, undetermined intent (event)                                       |
|     |      | 222708004 | ^Poisoning by and exposure to alcohol, occurrence at trade and service area, undetermined intent (event)                                   |
|     |      | 222709007 | ^Poisoning by and exposure to alcohol, occurrence at industrial and construction area, undetermined intent (event)                         |
|     |      | 222710002 | ^Poisoning by and exposure to alcohol, occurrence on farm, undetermined intent (event)                                                     |
|     |      | 222711003 | ^Poisoning by and exposure to alcohol, occurrence at other specified place, undetermined intent (event)                                    |

|                                                                                                                                                            |                                    |           |                                                                                                                     |
|------------------------------------------------------------------------------------------------------------------------------------------------------------|------------------------------------|-----------|---------------------------------------------------------------------------------------------------------------------|
|                                                                                                                                                            |                                    | 222713000 | ^Poisoning by and exposure to alcohol, occurrence at unspecified place, undetermined intent (event)                 |
|                                                                                                                                                            |                                    | 274776000 | Finding of alcohol in blood                                                                                         |
| Y90 (note that no generalised mapping matches were available with SNO-MED although lexical matching suggest use of the 'Finding of alcohol in blood' code) | No alcohol-specific code available | 223333005 | ^Evidence of alcohol involvement determined by blood alcohol level (navigational concept)                           |
|                                                                                                                                                            |                                    | 223334004 | ^Evidence of alcohol involvement determined by blood alcohol level of less than 20 mg/100 ml (navigational concept) |
|                                                                                                                                                            |                                    | 223335003 | ^Evidence of alcohol involvement determined by blood alcohol level of 20-39 mg/100 ml (navigational concept)        |
|                                                                                                                                                            |                                    | 223336002 | ^Evidence of alcohol involvement determined by blood alcohol level of 40-59 mg/100 ml (navigational concept)        |
|                                                                                                                                                            |                                    | 223337006 | ^Evidence of alcohol involvement determined by blood alcohol level of 60-79 mg/100 ml (navigational concept)        |
|                                                                                                                                                            |                                    | 223338001 | ^Evidence of alcohol involvement determined by blood alcohol level of 80-99 mg/100 ml (navigational concept)        |
|                                                                                                                                                            |                                    | 223339009 | ^Evidence of alcohol involvement determined by blood alcohol level of 100-119 mg/100 ml (navigational concept)      |
|                                                                                                                                                            |                                    | 223340006 | ^Evidence of alcohol involvement determined by blood alcohol level of 120-199 mg/100 ml (navigational concept)      |
|                                                                                                                                                            |                                    | 223341005 | ^Evidence of alcohol involvement determined by blood alcohol level                                                  |

|                                                                                                                                                                       |                                    |           |                                                                                                                               |
|-----------------------------------------------------------------------------------------------------------------------------------------------------------------------|------------------------------------|-----------|-------------------------------------------------------------------------------------------------------------------------------|
|                                                                                                                                                                       |                                    |           | of 200-239 mg/100 ml (navigational concept)                                                                                   |
|                                                                                                                                                                       |                                    | 223342003 | ^Evidence of alcohol involvement determined by blood alcohol level of 240 mg/100 ml or more (navigational concept)            |
|                                                                                                                                                                       |                                    | 223343008 | ^Evidence of alcohol involvement determined by presence of alcohol in blood, level not specified (navigational concept)       |
|                                                                                                                                                                       |                                    | 25702006  | Alcohol intoxication                                                                                                          |
| Y91 (note that generalised mapping matches were only available for Y91.1 and Y91.9 with SNO-MED although lexical matching suggest use of 'Alcohol intoxication' code) | No alcohol-specific code available | 230800004 | Alcoholic coma                                                                                                                |
|                                                                                                                                                                       |                                    | 82047000  | Diarrhoea due to alcohol intake                                                                                               |
|                                                                                                                                                                       |                                    | 361267005 | Alcohol-related fit                                                                                                           |
|                                                                                                                                                                       |                                    | 223344002 | ^Evidence of alcohol involvement determined by level of intoxication (navigational concept)                                   |
|                                                                                                                                                                       |                                    | 223345001 | ^Evidence of alcohol involvement determined by level of intoxication, mild alcohol intoxication (navigational concept)        |
|                                                                                                                                                                       |                                    | 223346000 | ^Evidence of alcohol involvement determined by level of intoxication, moderate alcohol intoxication (navigational concept)    |
|                                                                                                                                                                       |                                    | 223347009 | ^Evidence of alcohol involvement determined by level of intoxication, severe alcohol intoxication (navigational concept)      |
|                                                                                                                                                                       |                                    | 223348004 | ^Evidence of alcohol involvement determined by level of intoxication, very severe alcohol intoxication (navigational concept) |

1  
2  
3  
4  
5  
6  
7  
8  
9  
10  
11  
12  
13  
14  
15  
16  
17  
18  
19  
20  
21  
22  
23  
24  
25  
26  
27  
28  
29  
30  
31  
32  
33  
34  
35  
36  
37  
38  
39  
40  
41  
42  
43  
44  
45  
46  
47  
48  
49  
50  
51  
52  
53  
54  
55  
56  
57  
58  
59  
60

|  |  |           |                                                                                                                                           |
|--|--|-----------|-------------------------------------------------------------------------------------------------------------------------------------------|
|  |  | 223349007 | ^Evidence of alcohol involvement determined by level of intoxication, alcohol involvement, not otherwise specified (navigational concept) |
|--|--|-----------|-------------------------------------------------------------------------------------------------------------------------------------------|

For peer review only

## References

1. Toson B, Harvey LA, Close JC. New ICD-10 version of the Multipurpose Australian Comorbidity Scoring System outperformed Charlson and Elixhauser comorbidities in an older population. *J Clin Epidemiol* 2016;79:62-69. doi: 10.1016/j.jclinepi.2016.04.004 [published Online First: 2016/04/23]
2. Preen DB, Holman CD, Spilsbury K, et al. Length of comorbidity lookback period affected regression model performance of administrative health data. *J Clin Epidemiol* 2006;59(9):940-6. doi: 10.1016/j.jclinepi.2005.12.013 [published Online First: 2006/08/10]
3. NSW. *laPC. Statutory Guidelines on Research: Health Records and Information Privacy Act 2002 (NSW)*. 2002
4. Chikritzhs TC, P.; Stockwell, T.; Donath, S.; Ngo, H.; Young, D. and Mathews, S. *Australian alcohol indicators, 1990-2001: Patterns of alcohol use and related harms for Australian states and territories*. : Curtin University of Technology: National Drug Research Institute, 2003.
