# Supplementary material for: Protocol for the Data-Linkage Alcohol Cohort Study (DACS): investigating mortality, morbidity and offending among people with an alcohol-related problem using linked administrative data
Source: PubMed Central journal article supplement — BMJ Open. 2019 Aug 5;9(8):e030605. doi: 10.1136/bmjopen-2019-030605 (PMC6687018; doi:10.1136/bmjopen-2019-030605), 2019-08-05
Supplement: bmjopen-2019-030605supp001.pdf [file bmjopen-2019-030605supp001.pdf]

## Appendix 1: Diagnostic codes used for data extraction

### A) ICD codes

The codes on the following sheet will be used to identify people in the Admitted Patients Data Collection and Emergency Department Data Collection (cases). Codes were selected based on identification by NSW Health as reflective of an acute alcohol problem<sup>1</sup> or, where indicated (\*) from Turning Point Alcohol and Drug Centre guidance for calculating alcohol and other drug statistics<sup>2</sup>. Where indicated (~), additional codes are included on the basis of discussion between investigators and specialists in the field. ICD-9-CM and ICD-10-AM codes were mapped using the Australian Consortium for Classification Development mapping tables, with backwards mapping from ICD-10-AM to ICD-9-CM<sup>3</sup>, and alcohol-specific code mapping developed by Chikritzhs et al.<sup>4</sup>.

| ICD-10-AM | Conditions                                                 | ICD-9-CM                                  | Conditions                                                     |
|-----------|------------------------------------------------------------|-------------------------------------------|----------------------------------------------------------------|
| E24.4     | *Alcohol-induced pseudo-Cushing's syndrome                 | <i>No alcohol-specific code available</i> |                                                                |
| E51.2     | ~Wernicke encephalopathy                                   | 291.1                                     | Alcohol-induced persisting amnesic disorder                    |
| F10       | Mental and behavioural disorders due to use of alcohol     | 291                                       | Alcohol-induced mental disorders                               |
|           |                                                            | 303                                       | Alcohol dependence syndrome                                    |
|           |                                                            | 305.0                                     | Nondependent alcohol abuse                                     |
| G31.2     | *Degeneration of nervous system due to alcohol             | 303                                       | Alcohol dependence syndrome                                    |
| G62.1     | *Alcoholic polyneuropathy                                  | 357.5                                     | *Alcoholic polyneuropathy                                      |
| G72.1     | *Alcoholic myopathy                                        | <i>No alcohol-specific code available</i> |                                                                |
| I42.6     | *Alcoholic cardiomyopathy                                  | 425.5                                     | *Alcoholic cardiomyopathy                                      |
| K29.2     | *Alcoholic gastritis                                       | 535.3                                     | *Alcoholic gastritis                                           |
| K70.0     | Alcoholic fatty liver                                      | 571.0                                     | *Alcoholic fatty liver                                         |
| K70.1     | Alcoholic hepatitis                                        | 571.1                                     | Acute alcoholic hepatitis                                      |
| K70.2     | Alcoholic fibrosis and sclerosis of liver                  |                                           |                                                                |
| K70.3     | Alcoholic cirrhosis of liver                               | 571.2                                     | Alcoholic cirrhosis of liver                                   |
| K70.4     | Alcoholic hepatic failure                                  |                                           |                                                                |
| K70.9     | Alcoholic liver disease, unspecified                       | 571.3                                     | Alcoholic liver damage, unspecified                            |
| K85.2     | *Alcohol-induced acute pancreatitis                        | <i>No alcohol-specific code available</i> |                                                                |
| K86.0     | *Alcohol-induced chronic pancreatitis                      | <i>No alcohol-specific code available</i> |                                                                |
| O35.4     | *Maternal care for suspected damage to foetus from alcohol | <i>No alcohol-specific code available</i> |                                                                |
| P04.3     | *Foetus and newborn affected by maternal use of alcohol    | 760.71                                    | Alcohol affecting fetus or newborn via placenta or breast milk |

|                    |                                                                     |                                           |                                                          |
|--------------------|---------------------------------------------------------------------|-------------------------------------------|----------------------------------------------------------|
| Q86.0              | *Foetal alcohol syndrome (dysmorphic)                               |                                           |                                                          |
| R78.0              | Finding of alcohol in blood                                         | 790.3                                     | Excessive blood level of alcohol                         |
| T51                | Toxic effect of alcohol                                             | 980                                       | Toxic effect of alcohol                                  |
| X45                | Accidental poisoning by and exposure to alcohol                     | E860                                      | Accidental poisoning by alcohol not elsewhere classified |
| X65 <sup>^</sup>   | Intentional self-poisoning by and exposure to alcohol               | <i>No alcohol-specific code available</i> |                                                          |
| Y15                | Poisoning by and exposure to alcohol, undetermined intent           | E860                                      | Accidental poisoning by alcohol not elsewhere classified |
|                    |                                                                     | 980                                       | Toxic effect of alcohol                                  |
| Y90 <sup>^^</sup>  | Evidence of alcohol involvement determined by blood alcohol level   | <i>No alcohol-specific code available</i> |                                                          |
| Y91 <sup>^^^</sup> | Evidence of alcohol involvement determined by level of intoxication | <i>No alcohol-specific code available</i> |                                                          |

<sup>^</sup>note that no generalised mapping matches were available with SNO-MED although lexical matching suggest use of the above codes

<sup>^^</sup>note that no generalised mapping matches were available with SNO-MED although lexical matching suggest use of the 'Finding of alcohol in blood' code

<sup>^^^</sup>note that generalised mapping matches were only available for Y91.1 and Y91.9 with SNO-MED although lexical matching suggest use of 'Alcohol intoxication' code

## B) SNOMED codes

The following codes will be used to identify people in the Emergency Department Data Collection (cases). Emergency departments may use either or a combination of ICD-9, ICD-10 (see above) or SNOMED. Codes were mapped in consultation with the Clinical Terminology Team at the National E-Health Transition Authority (now Australian Digital Health Agency) to approximate ICD-10-AM codes using lexical and generalised mapping (the latter comprising the International SCT-ICD map) for SCT-AU (v20160430 April 2016). A number of codes were only found in ICD-10 and not ICD-10-CM (F10 K29.20 K29.21 T51 X45 X65 Y90 Y91), and thus these codes were searched with a wildcard for the last character, yielding hits for the following codes (F10.0 F10.1 F10.2 F10.3 F10.4 F10.5 F10.6 F10.7 F10.8 F10.9 K29.2 T51.0 T51.1 T51.2 T51.3 T51.9 X45 X45.99 Y91.1 Y91.9). Lexical mapping (i.e., synonym with a lexical match) was used for those codes where a hit was not identified with the International SCT-ICD map. Note that those variables flagged with a # were added following review of NSW Health codes for acute emergency department presentation data; the same applies where flagged with a ^, with the exception that these terms are now deprecated.

| ICD-10-AM | ICD-9-CM                                  | SNOMED-CT-AU    | CONDITIONS                                  |
|-----------|-------------------------------------------|-----------------|---------------------------------------------|
| E24.4     | <i>No alcohol-specific code available</i> | 237738005       | Pseudo-Cushing's syndrome due to alcohol    |
| E51.2     | 291.1                                     | 21007002        | Wernicke's disease                          |
| F10       | 291                                       | 191477001       | Pathological alcohol intoxication           |
|           | 303                                       | 42344001        | Alcohol-induced psychosis                   |
|           | 305.0                                     | 25702006        | Alcohol intoxication                        |
|           |                                           | 228315001       | Binge drinker                               |
|           |                                           | 18653004        | Alcohol intoxication delirium               |
|           |                                           | 21000000        | Idiosyncratic intoxication                  |
|           |                                           | 228341007       | Unable to abstain from drinking             |
|           |                                           | 32553006        | Hangover                                    |
|           |                                           | 228357007       | Persistent effect of alcohol                |
|           |                                           | 228316000       | Alcoholic binges exceeding sensible amounts |
|           |                                           | 268645007       | Nondependent alcohol abuse                  |
|           |                                           | 228354000       | Drink driving                               |
|           |                                           | 228317009       | Alcoholic binges exceeding safe amounts     |
|           |                                           | 191883007       | Nondependent alcohol abuse, episodic        |
|           |                                           | 169942003       | Maternal alcohol abuse                      |
|           |                                           | 304605000       | Methanol abuse                              |
|           |                                           | 288021000119107 | Disorder due to alcohol abuse               |
|           |                                           | 191882002       | Nondependent alcohol abuse, continuous      |
|           |                                           | 15167005        | Alcohol abuse                               |
|           |                                           | 284591009       | Persistent alcohol abuse                    |

|  |  |                   |                                                        |
|--|--|-------------------|--------------------------------------------------------|
|  |  | 228310006         | Drinks in morning to get rid of hangover               |
|  |  | 41083005          | Alcohol-induced sleep disorder                         |
|  |  | 191884001         | Nondependent alcohol abuse in remission                |
|  |  | 86325007          | Non megaloblastic anaemia due to alcoholism            |
|  |  | 191805002         | Episodic acute alcoholic intoxication in alcoholism    |
|  |  | 191802004         | Acute alcoholic intoxication in alcoholism             |
|  |  | 7200002           | Alcoholism                                             |
|  |  | 235955000         | Drug-induced chronic pancreatitis                      |
|  |  | 66590003          | Alcohol dependence                                     |
|  |  | 713583005         | Mild alcohol dependence                                |
|  |  | 2403008           | Psychoactive substance dependence                      |
|  |  | 25702006          | Alcohol intoxication                                   |
|  |  | 7200002           | Alcoholism                                             |
|  |  | 308742005         | Alcohol withdrawal-induced convulsion                  |
|  |  | 713862009         | Severe alcohol dependence                              |
|  |  | 10755041000119100 | Alcohol dependence in childbirth                       |
|  |  | 191812006         | Episodic chronic alcoholism                            |
|  |  | 2403008           | Psychoactive substance dependence                      |
|  |  | 154211000119108   | Chronic pancreatitis due to chronic alcoholism         |
|  |  | 191804003         | Continuous acute alcoholic intoxication in alcoholism  |
|  |  | 191813001         | Chronic alcoholism in remission                        |
|  |  | 7200002           | Alcoholism                                             |
|  |  | 87810006          | Megaloblastic anaemia due to alcoholism                |
|  |  | 66590003          | Alcohol dependence                                     |
|  |  | 231467000         | Absinthe addiction                                     |
|  |  | 300939009         | Abstinent alcoholic                                    |
|  |  | 191811004         | Continuous chronic alcoholism                          |
|  |  | 714829008         | Moderate alcohol dependence                            |
|  |  | 235952002         | Chronic pancreatitis due to acute alcohol intoxication |
|  |  | 97571000119109    | Thrombocytopenia co-occurrent and due to alcoholism    |
|  |  | 66590003          | Alcohol dependence                                     |
|  |  | 10741871000119101 | Alcohol dependence in pregnancy                        |
|  |  | 288041000119101   | Perceptual disturbance due to alcohol withdrawal       |

|  |  |           |                                                                                                                                                  |
|--|--|-----------|--------------------------------------------------------------------------------------------------------------------------------------------------|
|  |  | 191480000 | Alcohol withdrawal syndrome                                                                                                                      |
|  |  | 85561006  | Uncomplicated alcohol withdrawal                                                                                                                 |
|  |  | 191480000 | Alcohol withdrawal syndrome                                                                                                                      |
|  |  | 8635005   | Alcohol withdrawal delirium                                                                                                                      |
|  |  | 79578000  | Alcohol paranoia                                                                                                                                 |
|  |  | 61144001  | Alcohol-induced psychotic disorder with delusions                                                                                                |
|  |  | 191476005 | Alcohol withdrawal hallucinosis                                                                                                                  |
|  |  | 7052005   | Alcohol hallucinosis                                                                                                                             |
|  |  | 42344001  | Alcohol-induced psychosis                                                                                                                        |
|  |  | 191480000 | Alcohol withdrawal syndrome                                                                                                                      |
|  |  | 191478006 | Alcoholic paranoia                                                                                                                               |
|  |  | 191471000 | Korsakov's alcoholic psychosis with peripheral neuritis                                                                                          |
|  |  | 73097000  | Alcohol amnestic disorder                                                                                                                        |
|  |  | 192811002 | Alcoholic encephalopathy                                                                                                                         |
|  |  | 69482004  | Korsakoff's psychosis                                                                                                                            |
|  |  | 42344001  | Alcohol-induced psychosis                                                                                                                        |
|  |  | 281004    | Dementia associated with alcoholism                                                                                                              |
|  |  | 231463001 | ^Alcoholic dementia NOS (disorder)                                                                                                               |
|  |  | 191475009 | Chronic alcoholic brain syndrome                                                                                                                 |
|  |  | 78524005  | Alcohol-induced sexual dysfunction                                                                                                               |
|  |  | 34938008  | Alcohol-induced anxiety disorder                                                                                                                 |
|  |  | 228353006 | Reverse tolerance to alcohol                                                                                                                     |
|  |  | 228351008 | Physical tolerance to alcohol                                                                                                                    |
|  |  | 228350009 | Behavioural tolerance to alcohol                                                                                                                 |
|  |  | 53936005  | Alcohol-induced mood disorder                                                                                                                    |
|  |  | 228323004 | Drinking bout                                                                                                                                    |
|  |  | 29212009  | Alcohol-induced organic mental disorder                                                                                                          |
|  |  | 228322009 | Drinking episode                                                                                                                                 |
|  |  | 192206005 | ^Mental and behavioral disorders due to use of alcohol (disorder)                                                                                |
|  |  | 192207001 | ^Mental and behavioral disorders due to use of alcohol: acute intoxication (disorder)                                                            |
|  |  | 192208006 | ^Mental and behavioral disorders due to use of alcohol: harmful use (disorder)                                                                   |
|  |  | 192209003 | ^Mental and behavioural disorders due to use of alcohol: dependence syndrome) or (chronic alcoholism [& (addiction) or (dipsomania)]) (disorder) |

|       |       |                 |                                                                                                                                                             |
|-------|-------|-----------------|-------------------------------------------------------------------------------------------------------------------------------------------------------------|
|       |       | 192210008       | ^Mental and behavioral disorders due to use of alcohol: withdrawal state (disorder)                                                                         |
|       |       | 192211007       | ^Mental and behavioral disorders due to use of alcohol: withdrawal state with delirium (disorder)                                                           |
|       |       | 192212000       | ^Mental and behavioural disorders due to use of alcohol: psychotic disorder (& [hallucinosi] or [jealousy] or [paranoia] or [psychosis NOS])                |
|       |       | 192213005       | ^Mental and behavioral disorders due to use of alcohol: amnesic syndrome (disorder)                                                                         |
|       |       | 192214004       | ^Mental and behavioural disorders due to use of alcohol: residual and late-onset psychotic disorder) or (chronic alcoholic brain syndrome [& dementia NOS]) |
|       |       | 192215003       | ^Mental and behavioral disorders due to use of alcohol: other mental and behavioral disorders (disorder)                                                    |
|       |       | 268639004       | ^Chronic alcoholism (disorder)                                                                                                                              |
|       |       | 268683008       | ^Mental and behavioral disorders due to use of alcohol: dependence syndrome (disorder)                                                                      |
|       |       | 268684002       | ^Mental and behavioral disorders due to use of alcohol: psychotic disorder (disorder)                                                                       |
|       |       | 304606004       | ^Ethanol abuse (finding)                                                                                                                                    |
|       |       | 268685001       | ^Mental and behavioral disorders due to use of alcohol: residual and late-onset psychotic disorder (disorder)                                               |
|       |       | 192216002       | ^Mental and behavioral disorders due to use of alcohol: unspecified mental and behavioral disorder (disorder)                                               |
| G31.2 | 303   | 192811002       | Alcoholic encephalopathy                                                                                                                                    |
|       |       | 133301000119102 | Degenerative brain disorder due to alcohol                                                                                                                  |
|       |       | 300992002       | Alcohol-induced cerebellar ataxia                                                                                                                           |
|       |       | 361272001       | Cerebellar ataxia due to alcoholism                                                                                                                         |
|       |       | 135761000119101 | Cerebral degeneration due to alcoholism                                                                                                                     |
|       |       | 230353003       | Morel laminar sclerosis                                                                                                                                     |
|       |       | 361273006       | Alcoholic cerebellar degeneration                                                                                                                           |
| G62.1 | 357.5 | 192811002       | Alcoholic encephalopathy                                                                                                                                    |

|       |                                           |                  |                                                            |
|-------|-------------------------------------------|------------------|------------------------------------------------------------|
|       |                                           | 69482004         | Korsakoff's psychosis                                      |
|       |                                           | 191471000        | Korsakov's alcoholic psychosis with peripheral neuritis    |
|       |                                           | 7916009          | Alcoholic polyneuropathy                                   |
|       |                                           | 191472007        | #Wernicke-Korsakov syndrome (disorder)                     |
| G72.1 | <i>No alcohol-specific code available</i> | 19303008         | Alcohol myopathy                                           |
| I42.6 | 425.5                                     | 83521008         | Dilated cardiomyopathy caused by alcohol                   |
| K29.2 | 535.3                                     | 2043009          | Alcoholic gastritis                                        |
|       |                                           | 40241000119109   | Gastric haemorrhage due to alcoholic gastritis             |
| K70.0 | 571.0                                     | 41309000         | Alcoholic liver damage                                     |
| K70.1 | 571.1                                     | 50325005         | Alcoholic fatty liver                                      |
| K70.2 | 571.2                                     | 235875008        | Alcoholic hepatitis                                        |
| K70.3 | 571.3                                     | 9953008          | Acute alcoholic liver disease                              |
| K70.4 |                                           | 1085021000119106 | Hepatic ascites due to chronic alcoholic hepatitis         |
| K70.9 |                                           | 1082611000119101 | Ascites due to alcoholic hepatitis                         |
|       |                                           | 41309000         | Alcoholic liver damage                                     |
|       |                                           | 307757001        | Chronic alcoholic hepatitis                                |
|       |                                           | 235880004        | Alcoholic fibrosis and sclerosis of liver                  |
|       |                                           | 420054005        | Alcoholic cirrhosis                                        |
|       |                                           | 309783001        | Oesophageal varices in alcoholic cirrhosis of the liver    |
|       |                                           | 1082601000119104 | Ascites due to alcoholic cirrhosis                         |
|       |                                           | 235881000        | Alcoholic hepatic failure                                  |
|       |                                           | 1082621000119108 | Hepatic coma due to alcoholic liver failure                |
|       |                                           | 713370005        | Acute on chronic alcoholic liver disease                   |
|       |                                           | 713181003        | Chronic alcoholic liver disease                            |
| K85.2 | <i>No alcohol-specific code available</i> | 235942001        | Alcohol-induced acute pancreatitis                         |
|       |                                           | 445507008        | Alcohol-induced pancreatitis                               |
| K86.0 | <i>No alcohol-specific code available</i> | 235952002        | Chronic pancreatitis due to acute alcohol intoxication     |
|       |                                           | 154211000119108  | Chronic pancreatitis due to chronic alcoholism             |
| O35.4 | <i>No alcohol-specific code available</i> | 199551008        | Maternal care for (suspected) damage to fetus from alcohol |

|       |                                                                |           |                                                                                 |
|-------|----------------------------------------------------------------|-----------|---------------------------------------------------------------------------------|
| P04.3 | 760.71                                                         | 36558000  | Fetal or neonatal effect of alcohol transmitted via placenta and/or breast milk |
|       |                                                                | 268796000 | Fetal or neonatal effect of placental or breast transfer of alcohol             |
|       |                                                                | 698321001 | Neonatal effect of alcohol transmitted via breast milk                          |
|       |                                                                | 205791004 | Fetal or neonatal effect of maternal use of alcohol                             |
|       |                                                                | 609438005 | Fetal or neonatal effect of maternal alcohol addiction                          |
| Q86.0 | Alcohol affecting fetus or newborn via placenta or breast milk | 609437000 | Fetal Alcohol Spectrum Disorder                                                 |
|       |                                                                | 205788004 | Fetal alcohol syndrome                                                          |
|       |                                                                | 205791004 | Fetal or neonatal effect of maternal use of alcohol                             |
|       |                                                                | 36558000  | Fetal or neonatal effect of alcohol transmitted via placenta and/or breast milk |
| R78.0 | 790.3                                                          | 442766007 | Alcohol in blood specimen above reference range                                 |
|       |                                                                | 442669008 | Ethanol in blood specimen above legal threshold for operating vehicle           |
|       |                                                                | 441685000 | Ethanol in blood specimen above reference range                                 |
|       |                                                                | 274776000 | Finding of alcohol in blood                                                     |
|       |                                                                | 207273009 | ^Alcohol blood level excessive (situation)                                      |
|       |                                                                | 160592001 | Alcohol intake above recommended sensible limits                                |
| T51   | 980                                                            | 216633005 | Accidental poisoning by alcoholic beverage                                      |
|       |                                                                | 216635003 | Accidental poisoning by denatured alcohol                                       |
|       |                                                                | 95906008  | Drug interaction with alcohol                                                   |
|       |                                                                | 287166006 | Accidental poisoning with ethyl alcohol                                         |
|       |                                                                | 442764005 | Poisoning by benzene                                                            |
|       |                                                                | 82782008  | Alcohol poisoning                                                               |
|       |                                                                | 212807002 | Grain alcohol causing toxic effect                                              |
|       |                                                                | 216636002 | Accidental poisoning by methylated spirit                                       |
|       |                                                                | 315226008 | Pain in lymph nodes after alcohol consumption                                   |
|       |                                                                | 89507002  | Toxic effect of denatured alcohol                                               |
|       |                                                                | 25966003  | Metabolic acidosis due to methanol                                              |
|       |                                                                | 212809004 | Methyl alcohol causing toxic effect                                             |



|     |      |           |                                                        |
|-----|------|-----------|--------------------------------------------------------|
|     |      | 216640006 | Accidental poisoning by methanol                       |
|     |      | 212813006 | Toxic effect of isopropyl alcohol                      |
|     |      | 6749002   | Toxic effect of propyl alcohol                         |
|     |      | 216645001 | Accidental poisoning by isopropyl alcohol              |
|     |      | 216648004 | Accidental poisoning by rubbing alcohol substitute     |
|     |      | 4953006   | Toxic effect of butyl alcohol                          |
|     |      | 6749002   | Toxic effect of propyl alcohol                         |
|     |      | 57346004  | Toxic effect of fusel oil                              |
|     |      | 216651006 | Accidental poisoning by fusel oil                      |
|     |      | 87460008  | Toxic effect of amyl alcohol                           |
|     |      | 67426006  | Toxic effect of alcohol                                |
|     |      | 82047000  | Diarrhoea due to alcohol intake                        |
|     |      | 314539001 | Alcohol related optic neuropathy                       |
|     |      | 269765000 | Accidental poisoning by alcohol                        |
|     |      | 212816003 | ^Rubbing alcohol causing toxic effect (disorder)       |
|     |      | 212817007 | ^Isopropyl alcohol causing toxic effect NOS (disorder) |
|     |      | 212818002 | ^Fusel oil causing toxic effect NOS (disorder)         |
|     |      | 212819005 | ^Other alcohol causing toxic effect (disorder)         |
|     |      | 212820004 | ^Alcohol causing toxic effect NOS (disorder)           |
|     |      | 213687005 | ^Toxic effect of other alcohols (disorder)             |
|     |      | 212815004 | ^Isopropanol causing toxic effect (disorder)           |
|     |      | 212814000 | ^Dimethyl carbinol causing toxic effect (disorder)     |
|     |      | 212811008 | ^Wood alcohol causing toxic effect (disorder)          |
|     |      | 212808007 | ^Ethyl alcohol causing toxic effect NOS (disorder)     |
|     |      | 212806006 | ^Ethyl alcohol causing toxic effect (disorder)         |
|     |      | 699208000 | Thrombocytopenia due to alcohol                        |
| X45 | E860 | 212813006 | Toxic effect of isopropyl alcohol                      |
|     |      | 216640006 | Accidental poisoning by methanol                       |
|     |      | 82782008  | Alcohol poisoning                                      |
|     |      | 216635003 | Accidental poisoning by denatured alcohol              |
|     |      | 6749002   | Toxic effect of propyl alcohol                         |
|     |      | 212809004 | Methyl alcohol causing toxic effect                    |
|     |      | 242263000 | Accidental exposure to alcohol                         |

|  |  |           |                                                                                                                                  |
|--|--|-----------|----------------------------------------------------------------------------------------------------------------------------------|
|  |  | 216633005 | Accidental poisoning by alcoholic beverage                                                                                       |
|  |  | 212813006 | Toxic effect of isopropyl alcohol                                                                                                |
|  |  | 242265007 | Accidental exposure to ethanol                                                                                                   |
|  |  | 278363000 | Alcoholic macrocytosis                                                                                                           |
|  |  | 442764005 | Poisoning by benzene                                                                                                             |
|  |  | 4953006   | Toxic effect of butyl alcohol                                                                                                    |
|  |  | 287166006 | Accidental poisoning with ethyl alcohol                                                                                          |
|  |  | 699208000 | Thrombocytopenia due to alcohol                                                                                                  |
|  |  | 212809004 | Methyl alcohol causing toxic effect                                                                                              |
|  |  | 67426006  | Toxic effect of alcohol                                                                                                          |
|  |  | 6749002   | Toxic effect of propyl alcohol                                                                                                   |
|  |  | 216645001 | Accidental poisoning by isopropyl alcohol                                                                                        |
|  |  | 89507002  | Toxic effect of denatured alcohol                                                                                                |
|  |  | 212807002 | Grain alcohol causing toxic effect                                                                                               |
|  |  | 216648004 | Accidental poisoning by rubbing alcohol substitute                                                                               |
|  |  | 216651006 | Accidental poisoning by fusel oil                                                                                                |
|  |  | 216636002 | Accidental poisoning by methylated spirit                                                                                        |
|  |  | 89507002  | Toxic effect of denatured alcohol                                                                                                |
|  |  | 442764005 | Poisoning by benzene                                                                                                             |
|  |  | 87460008  | Toxic effect of amyl alcohol                                                                                                     |
|  |  | 269765000 | Accidental poisoning by alcohol                                                                                                  |
|  |  | 57346004  | Toxic effect of fusel oil                                                                                                        |
|  |  | 221843007 | ^Accidental poisoning by and exposure to alcohol, occurrence at home (event)                                                     |
|  |  | 221844001 | ^Accidental poisoning by and exposure to alcohol, occurrence in residential institution (event)                                  |
|  |  | 221845000 | ^Accidental poisoning by and exposure to alcohol, occurrence at school, other institution and public administrative area (event) |
|  |  | 221846004 | ^Accidental poisoning by and exposure to alcohol, occurrence at sports and athletics area (event)                                |
|  |  | 221847008 | ^Accidental poisoning by and exposure to alcohol, occurrence on street and highway (event)                                       |
|  |  | 221848003 | ^Accidental poisoning by and exposure to alcohol, occurrence at trade and service area (event)                                   |

|                                                                                                                                            |                                           |           |                                                                                                                                        |
|--------------------------------------------------------------------------------------------------------------------------------------------|-------------------------------------------|-----------|----------------------------------------------------------------------------------------------------------------------------------------|
|                                                                                                                                            |                                           | 221849006 | ^Accidental poisoning by and exposure to alcohol, occurrence at industrial and construction area (event)                               |
|                                                                                                                                            |                                           | 221850006 | ^Accidental poisoning by and exposure to alcohol, occurrence on farm (event)                                                           |
|                                                                                                                                            |                                           | 221851005 | ^Accidental poisoning by and exposure to alcohol, occurrence at other specified place (event)                                          |
|                                                                                                                                            |                                           | 221852003 | ^Accidental poisoning by and exposure to alcohol, occurrence at unspecified place (event)                                              |
|                                                                                                                                            |                                           | 57346004  | Toxic effect of fusel oil                                                                                                              |
| <i>X65 (note that no generalised mapping matches were available with SNO-MED although lexical matching suggest use of the above codes)</i> | <i>No alcohol-specific code available</i> | 222103001 | ^Intentional self-poisoning by and exposure to alcohol (event)                                                                         |
|                                                                                                                                            |                                           | 222104007 | ^Intentional self-poisoning by and exposure to alcohol, occurrence at home (event)                                                     |
|                                                                                                                                            |                                           | 222105008 | ^Intentional self-poisoning by and exposure to alcohol, occurrence in residential institution (event)                                  |
|                                                                                                                                            |                                           | 222106009 | ^Intentional self-poisoning by and exposure to alcohol, occurrence at school, other institution and public administrative area (event) |
|                                                                                                                                            |                                           | 222107000 | ^Intentional self-poisoning by and exposure to alcohol, occurrence at sports and athletics area (event)                                |
|                                                                                                                                            |                                           | 222108005 | ^Intentional self-poisoning by and exposure to alcohol, occurrence on street and highway (event)                                       |
|                                                                                                                                            |                                           | 222110007 | ^Intentional self-poisoning by and exposure to alcohol, occurrence at trade and service area (event)                                   |
|                                                                                                                                            |                                           | 222111006 | ^Intentional self-poisoning by and exposure to alcohol, occurrence at industrial and construction area (event)                         |

|     |      |           |                                                                                                                                            |
|-----|------|-----------|--------------------------------------------------------------------------------------------------------------------------------------------|
|     |      | 222112004 | ^Intentional self-poisoning by and exposure to alcohol, occurrence on farm (event)                                                         |
|     |      | 222113009 | ^Intentional self-poisoning by and exposure to alcohol, occurrence at other specified place (event)                                        |
|     |      | 222114003 | ^Intentional self-poisoning by and exposure to alcohol, occurrence at unspecified place (event)                                            |
|     |      | 312963001 | Methanol retinopathy                                                                                                                       |
| Y15 | E860 | 222702003 | ^Poisoning by and exposure to alcohol, undetermined intent (event)                                                                         |
|     | 980  | 222703008 | ^Poisoning by and exposure to alcohol, occurrence at home, undetermined intent (event)                                                     |
|     |      | 222704002 | ^Poisoning by and exposure to alcohol, occurrence in residential institution, undetermined intent (event)                                  |
|     |      | 222705001 | ^Poisoning by and exposure to alcohol, occurrence at school, other institution and public administrative area, undetermined intent (event) |
|     |      | 222706000 | ^Poisoning by and exposure to alcohol, occurrence at sports and athletics area, undetermined intent (event)                                |
|     |      | 222707009 | ^Poisoning by and exposure to alcohol, occurrence on street and highway, undetermined intent (event)                                       |
|     |      | 222708004 | ^Poisoning by and exposure to alcohol, occurrence at trade and service area, undetermined intent (event)                                   |
|     |      | 222709007 | ^Poisoning by and exposure to alcohol, occurrence at industrial and construction area, undetermined intent (event)                         |
|     |      | 222710002 | ^Poisoning by and exposure to alcohol, occurrence on farm, undetermined intent (event)                                                     |
|     |      | 222711003 | ^Poisoning by and exposure to alcohol, occurrence at other specified place, undetermined intent (event)                                    |

|                                                                                                                                                                   |                                           |           |                                                                                                                     |
|-------------------------------------------------------------------------------------------------------------------------------------------------------------------|-------------------------------------------|-----------|---------------------------------------------------------------------------------------------------------------------|
|                                                                                                                                                                   |                                           | 222713000 | ^Poisoning by and exposure to alcohol, occurrence at unspecified place, undetermined intent (event)                 |
|                                                                                                                                                                   |                                           | 274776000 | Finding of alcohol in blood                                                                                         |
| <i>Y90 (note that no generalised mapping matches were available with SNO-MED although lexical matching suggest use of the 'Finding of alcohol in blood' code)</i> | <i>No alcohol-specific code available</i> | 223333005 | ^Evidence of alcohol involvement determined by blood alcohol level (navigational concept)                           |
|                                                                                                                                                                   |                                           | 223334004 | ^Evidence of alcohol involvement determined by blood alcohol level of less than 20 mg/100 ml (navigational concept) |
|                                                                                                                                                                   |                                           | 223335003 | ^Evidence of alcohol involvement determined by blood alcohol level of 20-39 mg/100 ml (navigational concept)        |
|                                                                                                                                                                   |                                           | 223336002 | ^Evidence of alcohol involvement determined by blood alcohol level of 40-59 mg/100 ml (navigational concept)        |
|                                                                                                                                                                   |                                           | 223337006 | ^Evidence of alcohol involvement determined by blood alcohol level of 60-79 mg/100 ml (navigational concept)        |
|                                                                                                                                                                   |                                           | 223338001 | ^Evidence of alcohol involvement determined by blood alcohol level of 80-99 mg/100 ml (navigational concept)        |
|                                                                                                                                                                   |                                           | 223339009 | ^Evidence of alcohol involvement determined by blood alcohol level of 100-119 mg/100 ml (navigational concept)      |
|                                                                                                                                                                   |                                           | 223340006 | ^Evidence of alcohol involvement determined by blood alcohol level of 120-199 mg/100 ml (navigational concept)      |
|                                                                                                                                                                   |                                           | 223341005 | ^Evidence of alcohol involvement determined by blood alcohol level                                                  |

|                                                                                                                                                                       |                                    |           |                                                                                                                               |
|-----------------------------------------------------------------------------------------------------------------------------------------------------------------------|------------------------------------|-----------|-------------------------------------------------------------------------------------------------------------------------------|
|                                                                                                                                                                       |                                    |           | of 200-239 mg/100 ml (navigational concept)                                                                                   |
|                                                                                                                                                                       |                                    | 223342003 | ^Evidence of alcohol involvement determined by blood alcohol level of 240 mg/100 ml or more (navigational concept)            |
|                                                                                                                                                                       |                                    | 223343008 | ^Evidence of alcohol involvement determined by presence of alcohol in blood, level not specified (navigational concept)       |
|                                                                                                                                                                       |                                    | 25702006  | Alcohol intoxication                                                                                                          |
| Y91 (note that generalised mapping matches were only available for Y91.1 and Y91.9 with SNO-MED although lexical matching suggest use of 'Alcohol intoxication' code) | No alcohol-specific code available | 230800004 | Alcoholic coma                                                                                                                |
|                                                                                                                                                                       |                                    | 82047000  | Diarrhoea due to alcohol intake                                                                                               |
|                                                                                                                                                                       |                                    | 361267005 | Alcohol-related fit                                                                                                           |
|                                                                                                                                                                       |                                    | 223344002 | ^Evidence of alcohol involvement determined by level of intoxication (navigational concept)                                   |
|                                                                                                                                                                       |                                    | 223345001 | ^Evidence of alcohol involvement determined by level of intoxication, mild alcohol intoxication (navigational concept)        |
|                                                                                                                                                                       |                                    | 223346000 | ^Evidence of alcohol involvement determined by level of intoxication, moderate alcohol intoxication (navigational concept)    |
|                                                                                                                                                                       |                                    | 223347009 | ^Evidence of alcohol involvement determined by level of intoxication, severe alcohol intoxication (navigational concept)      |
|                                                                                                                                                                       |                                    | 223348004 | ^Evidence of alcohol involvement determined by level of intoxication, very severe alcohol intoxication (navigational concept) |

|  |  |           |                                                                                                                                           |
|--|--|-----------|-------------------------------------------------------------------------------------------------------------------------------------------|
|  |  | 223349007 | ^Evidence of alcohol involvement determined by level of intoxication, alcohol involvement, not otherwise specified (navigational concept) |
|--|--|-----------|-------------------------------------------------------------------------------------------------------------------------------------------|

## References

1. Toson B, Harvey LA, Close JC. New ICD-10 version of the Multipurpose Australian Comorbidity Scoring System outperformed Charlson and Elixhauser comorbidities in an older population. *J Clin Epidemiol* 2016;79:62-69. doi: 10.1016/j.jclinepi.2016.04.004 [published Online First: 2016/04/23]
2. Preen DB, Holman CD, Spilsbury K, et al. Length of comorbidity lookback period affected regression model performance of administrative health data. *J Clin Epidemiol* 2006;59(9):940-6. doi: 10.1016/j.jclinepi.2005.12.013 [published Online First: 2006/08/10]
3. NSW. *laPC. Statutory Guidelines on Research: Health Records and Information Privacy Act 2002 (NSW)*. 2002
4. Chikritzhs TC, P.; Stockwell, T.; Donath, S.; Ngo, H.; Young, D. and Mathews, S. *Australian alcohol indicators, 1990-2001: Patterns of alcohol use and related harms for Australian states and territories*. : Curtin University of Technology: National Drug Research Institute, 2003.
